1

2

3

4

5

6 **Targeting Nup358/RanBP2 by a viral protein disrupts stress granule formation**

7

8 Jibin Sadasivan<sup>1</sup>, Marli Vlok<sup>1</sup>, Xinying Wang<sup>1</sup>, Arabinda Nayak<sup>2</sup>, Raul Andino<sup>2</sup> and Eric

9 Jan<sup>1\*</sup>

10

11 <sup>1</sup>Department of Biochemistry and Molecular Biology, Life Sciences Institute, University  
12 of British Columbia, Vancouver, BC, Canada

13 <sup>2</sup>Department of Microbiology and Immunology, University of California San Francisco,  
14 San Francisco, CA 94158, USA

15

16 \*Corresponding author:

17 Email: [ej@mail.ubc.ca](mailto:ej@mail.ubc.ca)

18

19 Keywords: stress granules, virus, dicistrovirus, RNA, antiviral, RNA transport

20

## 21 **ABSTRACT**

22 Viruses have evolved mechanisms to modulate cellular pathways to facilitate infection.  
23 One such pathway is the formation of stress granules (SG), which are ribonucleoprotein  
24 complexes that assemble during translation inhibition following cellular stress. Inhibition  
25 of SG assembly has been observed under numerous virus infections across species,  
26 suggesting a conserved fundamental viral strategy. However, the significance of SG  
27 modulation during virus infection is not fully understood. The 1A protein encoded by the  
28 model dicistrovirus, Cricket Paralysis Virus (CrPV), is a multifunctional protein that can  
29 bind to and degrade Ago-2 in an E3 ubiquitin ligase-dependent manner to block the  
30 antiviral RNA interference pathway and inhibit SG formation. Moreover, the R146  
31 residue of 1A is necessary for SG inhibition and CrPV infection in both *Drosophila* S2  
32 cells and adult flies. Here, we uncoupled CrPV-1A's functions and provide insight into its  
33 underlying mechanism for SG inhibition. CrPV-1A mediated inhibition of SGs requires  
34 the E3 ubiquitin-ligase binding domain and the R146 residue, but not the Ago-2 binding  
35 domain. Wild-type but not mutant CrPV-1A R146A localizes to the nuclear membrane  
36 which correlates with nuclear enrichment of poly(A)<sup>+</sup> RNA. Transcriptome changes in  
37 CrPV-infected cells are dependent on the R146 residue. Finally, Nup358/RanBP2 is  
38 targeted and degraded in CrPV-infected cells in an R146-dependent manner and the  
39 depletion of Nup358 blocks SG formation. We propose that CrPV utilizes a multiprong  
40 strategy whereby the CrPV-1A protein interferes with a nuclear event that contributes to  
41 SG inhibition in order to promote infection.

## 42 **AUTHOR SUMMARY**

43 Viruses often inhibit a cellular stress response that leads to the accumulation of RNA  
44 and protein condensates called stress granules. How this occurs and why this would  
45 benefit virus infection are not fully understood. Here, we reveal a viral protein that can  
46 block stress granules and identify a key amino acid residue in the protein that  
47 inactivates this function. We demonstrate that this viral protein has multiple functions to  
48 modulate nuclear events including mRNA export and transcription to regulate stress  
49 granule formation. We identify a key host protein that is important for viral protein  
50 mediate stress granule inhibition, thus providing mechanistic insights. This study reveals  
51 a novel viral strategy in modulating stress granule formation to promote virus infection.

## 52 INTRODUCTION

53           Stress granules (SGs) are dynamic, non-membranous, cytosolic aggregates of  
54 ribonucleoprotein (RNP) complexes that assemble following cellular stress (1).  
55 Typically, overall translational inhibition resulting from a cellular stress response  
56 promotes SG formation, but is not necessary under certain cellular contexts (2–4). SGs  
57 contain non-translating mRNAs, translation initiation factors and ribonucleoproteins (5).  
58 The assembly of SGs is mediated through the interactions of proteins with non-  
59 translating RNAs, resulting in liquid-liquid phase separation, where in part the RNA  
60 component serves as scaffolds for recruitment of RNA binding proteins. SG assembly is  
61 proposed to be a multistep process in which the assembly of a stable dense core of  
62 mRNA and proteins is held together by a surrounding shell of less concentrated RNPs  
63 (6). Common SG protein markers include RasGAP-SH3-binding protein (G3BP1), T-cell  
64 intracellular antigen 1 (TIA-1), TIA-1 related protein (TIAR) and Poly-A binding protein  
65 (PABP), however, hundreds of other proteins have been identified that are enriched in  
66 SGs (7,8). Moreover, relatively long mRNAs are enriched in SGs, possibly to promote  
67 concentration of proteins for liquid-liquid phase separation (9,10). SGs are dynamic and  
68 reversible structures that continuously sort and route messenger RNP (mRNP)  
69 components. SGs affect mRNP localization, functions and signaling pathways that can  
70 have significant impacts on biological processes (11). As such, the dysregulation of SG  
71 assembly/disassembly is implicated in neurodegenerative diseases, autoimmune  
72 diseases, cancers and virus infections (12). Over the past decade, significant progress  
73 has been made in unraveling the SG composition and assembly pathways. However,

74 the molecular mechanism and underlying signaling pathways that regulate SG  
75 dynamics, and the consequences of SG assembly are not completely understood.

76 Classical induction of SG assembly is initiated by the activation of one or more  
77 stress-sensing eIF2 $\alpha$  kinases, that phosphorylate Ser-51 of the  $\alpha$  subunit of eukaryotic  
78 translation initiation factor 2 (eIF2), which is the main factor that delivers initiator Met-  
79 tRNA to the 40S pre-initiation complex (13). In mammals, there are four eIF2 $\alpha$  kinases,  
80 Protein kinase R (PKR), Protein kinase RNA-like endoplasmic reticulum kinase (PERK),  
81 Gene control nonderepressible 2 (GCN2) and Heme-regulated inhibitor kinase (HRI)  
82 (14–17); whereas in insects, there are only two, PERK and GCN2 (18). Phosphorylation  
83 of eIF2 $\alpha$  results in inhibition of overall translation in the cell which can lead to robust SG  
84 formation. As a result, besides hallmark SG protein markers and poly(A)<sup>+</sup> RNA, several  
85 eukaryotic translation initiation factors and the 40S subunit are often found in SG foci  
86 (19). Although it is often thought that translation inhibition is a pre-requisite for SG  
87 formation, this is not strictly necessary under certain cellular contexts (20).

88 Virus infection, in general, leads to modulation and inhibition of SG formation  
89 (21,22), which is observed across different classes of RNA and DNA viruses and across  
90 species suggesting a fundamental viral strategy to modulate SGs for productive  
91 infection. For example, RNA viruses such as poliovirus and HCV infection leads to a  
92 depletion of G3BP1 and TIA1 foci formation (23,24). The disruption of SG assembly can  
93 be attributed to one or more viral proteins, which has revealed distinct mechanisms that  
94 affect SG. One such mechanism is to counter SG assembly by modulating PKR  
95 activation. For instance, Middle East Respiratory Syndrome (MERS) Coronavirus  
96 accessory protein 4a, Influenza virus NS1 protein, Vaccinia virus E3L inhibits SG

97 formation by sequestering dsRNA to block PKR activation (25–28). Kaposi’s sarcoma-  
98 associated herpesvirus (KSHV) ORF57 protein binds to PKR and PKR activating protein  
99 (PACT) to inhibit PKR activation and SG formation (29). Besides modulating PKR  
100 activity, some viruses act directly on SG through virally-encoded proteases that cleave  
101 key SG proteins to facilitate SG disassembly. Poliovirus 3C protease and Foot-and-  
102 mouth disease virus (FMDV) 3C and Leader proteases cleave G3BP to inhibit SG  
103 formation (23,30,31). Viruses also co-opt SG components to facilitate infection.  
104 Flaviviruses such as West Nile virus and Zika virus hijack SG-nucleating proteins TIA-  
105 1, TIAR and G3BP and subvert them to viral replication complexes (32,33) whereas  
106 Human Immunodeficiency virus-1 (HIV-1) sequesters the SG protein Staufen-1 to RNPs  
107 containing viral RNA and gag protein (34). Murine norovirus utilizes the NS3 protein to  
108 redistribute G3BP to the site of viral replication (35). In addition, the Severe Acute  
109 Respiratory Syndrome-Coronavirus-2 (SARS-CoV-2) nucleocapsid protein phase  
110 separates with G3BPs and rewires the G3BP interactome to disassemble SGs (36–38).  
111 The distinct mechanisms and utilization of viral proteins to disassemble SGs across  
112 different virus classes highlight the importance of SG modulation during virus infection.

113         Although it is apparent that viruses modulate SGs, the reasons underlying this  
114 event are not fully understood. SG formation may sequester viral protein or RNA, as  
115 observed with flavivirus infection (39), thus inhibition of SG may be a general viral  
116 strategy to allow viral protein synthesis and replication. Alternatively, antiviral RNA  
117 sensors and factors such as PKR, Retinoic acid inducible gene I (RIG-I), Melanoma  
118 differentiation-associated protein 5 (MDA5), oligoadenylate synthetase (OAS),  
119 ribonuclease L (RNase L), Tripartite motif containing 5 (Trim5), RNA-specific adenosine

120 deaminase 1 (ADAR1) and cyclic GMP-AMP synthase (cGAS) have been found in SGs,  
121 termed antiviral SGs (avSGs)6776, which may act as an antiviral hub to co-ordinate  
122 immune responses to limit viral replication (40–43). Influenza A virus RNA and RIG-1  
123 have been found in avSGs during infection, which is thought to trigger the RIG-I-  
124 dependent interferon response (42). Finally, studies have implicated SG formation in  
125 apoptosis, thus blocking SG during infection may delay this process to allow completion  
126 of the viral life cycle (44). The functional consequences of SG formation and its causal  
127 relationship to virus infection remains to be clarified.

128         Dicistroviruses are single stranded positive sense RNA viruses that primarily  
129 infect arthropods (45,46). Members of the Dicistroviridae family include the honeybee  
130 dicistroviruses, Israeli acute paralysis virus, Kashmiri bee virus and Black queen cell  
131 virus, that have been linked to honeybee disease, and Taura syndrome virus, which has  
132 led to panaeid shrimp outbreaks (47). The dicistrovirus RNA genome consists of two  
133 main open reading frames (ORF) (Fig 1A). ORF1 encodes the viral non-structural  
134 proteins, such as the RNA helicase, protease and RNA-dependent RNA polymerase  
135 and ORF2 encodes the viral structural proteins, which mediate virion assembly (45).  
136 Both ORFs are driven by distinct internal ribosome entry sites (IRES) that have been  
137 studied extensively (48–51). The intergenic IRES utilizes a streamlined translation  
138 initiation mechanism whereby the IRES mediate direct assembly of ribosomes and  
139 starts translation at a non-AUG codon (45,52). The dicistrovirus Cricket paralysis virus  
140 (CrPV) and Rhopalosiphum padi virus (RhPV) 5'UTR IRES resembles an IRES similar  
141 to the mechanism used by hepatitis C virus, requiring translation initiation factors, eIF2,

142 eIF3 and initiator Met-tRNA<sub>i</sub> to start translation (53–55). Studies using model  
143 dicistroviruses CrPV and Drosophila C virus (DCV) have uncovered fundamental virus  
144 host interactions in insects. Dicistrovirus infections can lead to transcriptional and  
145 translational shutdown, evasion of the insect antiviral RNAi response and SG inhibition  
146 (56–59).

147         The CrPV and DCV 1A proteins are viral suppressors of RNAi (VSR) that  
148 suppress the insect antiviral RNAi pathway (58,59). The 1A protein is the first viral non-  
149 structural protein translated within ORF1. Immediately downstream of the 1A protein is  
150 a 2A peptide, which mediates a "stop-go" translation mechanism that leads to release of  
151 the mature 1A protein (60). DCV-1A, a 99 amino acid protein, is a double-stranded RNA  
152 (dsRNA) binding protein that sequesters dsRNA intermediates from Dicer-2 mediated  
153 processing by the RNAi machinery. CrPV-1A, a 166 amino acid protein, employs a dual  
154 mechanism by which it binds to and inhibits Argonaute-2 (Ago-2) activity and stability  
155 (58,59,61). Ago-2 mutant Drosophila are more susceptible to dicistrovirus infection,  
156 demonstrating the importance of the antiviral effects of Ago-2 (61,62). CrPV-1A binding  
157 to Ago-2 inhibits its activity and also leads to Ago-2 degradation via an E3 ubiquitin  
158 ligase-dependent pathway (59). Biochemical and single molecule studies showed that  
159 CrPV-1A inhibits the initial seed base-pairing targeting by Ago-2-RISC (RNA induced  
160 silencing complex) (63). Structural and biochemical analyses have mapped distinct  
161 functions to specific domains on CrPV-1A. Specifically, CrPV-1A interacts with Ago-2  
162 through a flexible loop containing a TALOS (targeting argonaute for loss of silencing)  
163 element and recruits the host ubiquitin complex, Cul-2-Rbx1-EloBC through a BC box  
164 domain (Fig 1A) (59). The F114 residue within TALOS is critical for Ago-2 binding and



165 the L17 and A21 residues in the BC box domain are required for recruitment of the  
166 ubiquitin ligase complex (59). We previously showed that the CrPV-1A protein inhibits  
167 SG foci formation and transcription (64). CrPV-1A's ability to inhibit SG and transcription  
168 is mapped to a single R146 residue at the C terminus. Mutant CrPV (R146A) virus  
169 infection is attenuated which is correlated with an increase in SG formation, strongly  
170 implicating potential antiviral properties of SG formation. Moreover, blocking  
171 transcription inhibited SG formation and restored CrPV (R146A) virus infection,  
172 suggesting that the SG modulation is linked to a nuclear event(s) (64). In summary,  
173 CrPV-1A is a multifunctional protein that modulates several host cell processes to  
174 promote infection. Whether the specific functions of CrPV-1A are mutually exclusive or  
175 interdependent have yet to be examined.

176 In this study, we use overexpression and mutagenesis approaches to uncouple  
177 the relationship between the multiple functions of CrPV-1A. We show that CrPV-1A's  
178 ability to inhibit SGs is dependent on the BC Box ubiquitin complex-interacting domain  
179 and independent of the Ago-2 binding TALOS element. We also demonstrate that  
180 CrPV-1A localizes to the nuclear periphery which correlates with nuclear poly(A)+ RNA  
181 enrichment. Transcriptome analysis and gene depletion studies suggest that CrPV-1A  
182 modulates host steady state RNA levels and mRNA export. Finally, productive CrPV  
183 infection requires the nuclear pore complex protein Nup358/RanBP2 in a CrPV-1A  
184 R146-dependent manner. We propose that CrPV-1A mediated SG inhibition is linked to  
185 nuclear events including transcriptional shutoff and nuclear mRNA accumulation to  
186 promote infection.

## 187 **RESULTS**

### 188 **CrPV-1A mediated stress granule inhibition in arsenite-treated cells**

189 SG assembly can be induced through distinct pathways by targeting the activity  
190 of specific translation initiation factors (2,65,66). The CrPV-1A protein is relatively small  
191 (166 amino acids) and has multiple functions including inhibition of SG and RNAi  
192 (58,59,64). Mutation of F114 to alanine (F114A) disrupts CrPV-1A interactions with Ago-  
193 2 and mutations L17A and A21D within the BC box domain block CrPV-1A recruitment  
194 with the Cul-2-Rbx1-EloBC complex (Fig 1A). We previously showed that expression of  
195 CrPV-1A inhibits SG formation in Drosophila S2 cells treated with Pateamine A (Pat A),  
196 which is a compound that dysregulates the helicase activity of the translation initiation  
197 factor, eIF4A (64,67). We examined whether inhibition of SGs by CrPV-1A can occur  
198 through another stress-induced pathway. Arsenite inhibits global translation by  
199 activating the two eIF2 $\alpha$  kinases in Drosophila, PERK and GCN2, to inhibit eIF2 activity  
200 (18).

201 To monitor cells that express CrPV-1A, we generated a novel GFP-based mRNA  
202 reporter (CrPV-1A-2A-GFP; Fig 1B) containing the CrPV-1A open reading frame (amino  
203 acids 1-166; Q9IJX4) fused in frame with GFP and the natural genome arrangement  
204 containing the CrPV-2A peptide, which is upstream of GFP thus allowing the “stop-go”  
205 translation mechanism to separate the CrPV-1A and GFP proteins (60). We appended  
206 the CrPV 5'-UTR IRES and 3'UTR to ensure expression of CrPV-1A. We transfected *in*  
207 *vitro* transcribed CrPV-1A-2A-GFP RNAs into S2 cells in order to bypass the inhibitory  
208 effects of CrPV-1A on transcription (64).

209 To examine SG assembly, we monitored Rasputin (Rin) foci formation by  
210 immunofluorescence in S2 cells transfected with *in vitro* transcribed CrPV-1A-2A-GFP  
211 RNA or 5'cap-GFP-poly(A) RNA. Rin is the Drosophila homolog of mammalian G3BP1,  
212 which is a hallmark SG marker protein (68). We previously showed that expression of  
213 CrPV-1A resulted in SG inhibition, specifically reducing the number of Rin foci per cell  
214 (64). In cells expressing control GFP, Rin protein remained diffuse in the cytoplasm (Fig  
215 1C). Arsenite treatment of S2 cells transfected with control GFP RNA resulted in robust  
216 induction of Rin foci per cell (Fig 1C-D). By contrast, cells transfected with the CrPV-1A-  
217 2A-GFP RNA resulted in fewer Rin foci per cell in the presence of arsenite treatment,  
218 similar to that observed previously under pateamine A treatment (64). The residue R146  
219 of CrPV-1A is required for CrPV-1A-mediated SG inhibition (64). Transfection of mutant  
220 CrPV-1A(R146A)-2A-GFP in arsenite-treated cells did not reduce the number of Rin foci  
221 per cell as compared to cells expressing GFP alone (Fig 1C,1D). In summary, these  
222 results indicate that CrPV-1A expression can inhibit distinct SG assembly pathways and  
223 the R146 residue is critical for CrPV-1A mediated SG inhibition

224

### 225 **Uncoupling CrPV-1A multifunctional domains and stress granule inhibition**

226 To determine whether the effects of CrPV-1A on SG inhibition are associated  
227 with other functions of CrPV-1A such as Ago-2 binding, we generated specific or  
228 combinations of mutations within the CrPV-1A reporter RNA (Fig 1A). Specifically, we  
229 expressed mutant CrPV-1A protein containing either F114A or double mutants  
230 F114A/R146A and monitored Rin foci formation in S2 cells under arsenite treatment.

231 Expression of CrPV-1A (F114A)-2A-GFP reduced the number of Rin foci per cell,  
232 similar to that observed when wild-type CrPV-1A is expressed (Fig 2A-B). By contrast,  
233 expression of the double mutant CrPV-1A (F114A/R146A)-2A-GFP did not reduce the  
234 number of Rin foci per cell, which is similar to that observed when CrPV-1A(R146A)-2A-  
235 GFP is expressed (Fig 2A-B). These results strongly showed that CrPV-1A-mediated  
236 SG inhibition is independent of Ago-2 binding.

237 We next investigated whether the BC box domain of CrPV-1A is required for SG  
238 inhibition. The BC box domain recruits the Cul-2-Rbx1-EloBC complex. Mutations L17A  
239 and A21D within the BC box domain block the recruitment of the Cul-2-Rbx1-EloBC  
240 complex, thereby inhibiting E3 ubiquitin ligase activity (59). Expression of mutant CrPV-  
241 1A containing L17A or A21D mutations did not reduce the number of Rin foci per cell in  
242 cells treated with arsenite (Fig 2A-B), thus suggesting that the BC box domain is  
243 required for inhibition of SG by CrPV-1A. Expression of a double mutant CrPV-1A  
244 (R146A/A21D)-2A-GFP in arsenite-treated S2 cells showed similar inhibition to that of  
245 single mutant CrPV-1A (R146A)-2A-GFP, thus supporting the conclusion that R146 is  
246 required for CrPV-1A's ability to block SG formation. We also investigated the double  
247 mutant CrPV-1A (F114A/A21D)-2A-GFP; expression of this mutant led to a similar  
248 number of Rin foci per cell as the single mutant CrPV-1A (A21D)-2A-GFP. This data  
249 confirmed that the BC box domain and not the Ago-2 binding domain of CrPV-1A is  
250 required for SG inhibition.

251

252 **Mutations within CrPV-1A affect 2A peptide activity**

253 To determine whether the effects on SG inhibition are due to differences in CrPV-  
254 1A protein levels, we monitored wild-type and mutant CrPV-1A protein levels in  
255 transfected cells by immunoblotting using anti-GFP and anti-CrPV-1A, which we raised  
256 against purified recombinant CrPV-1A protein (Fig 3A). The individual CrPV-1A and  
257 GFP proteins were detected at similar levels after transfection, indicating that the wild-  
258 type and mutant CrPV-1A proteins are expressed and processed efficiently by the  
259 CrPV-2A 'stop-go' translation activity (>99% efficiency). In general, these results  
260 indicated that the effects of CrPV-1A on SG formation are not due to differences in  
261 protein levels. However, upon longer exposure, we observed that the mutant CrPV-1A  
262 (R146A) resulted in a slower migrating band with a mass that is predicted to be the  
263 unprocessed fusion CrPV-1A-2A-GFP protein (Fig 3A). To further confirm these results,  
264 we directly monitored *in vitro* protein synthesis of the CrPV-1A-2A-GFP RNA in Sf-21  
265 insect lysates containing [<sup>35</sup>S]-Met/Cys (Fig 3B-C). Similar to that observed in  
266 transfected cells, the majority of CrPV-1A mutants resulted in expression of separate  
267 CrPV-1A and GFP proteins, however, a minor unprocessed CrPV-1A-2A-GFP protein,  
268 ~2% of the total protein, was detected with the R146A mutation (Figure 3B-C).

269 To investigate this further, we monitored CrPV-1A expression in CrPV-infected  
270 S2 cells (MOI 10) using antibodies against non-structural proteins, CrPV-1A and the 3C-  
271 like protease and the structural protein, VP2 (Fig 3D). Immunoblotting showed that VP2  
272 expression is reduced in CrPV(R146A)-infected cells, as shown previously (64). The  
273 CrPV-3C-like protease antibody detected several unprocessed precursor polyproteins  
274 and the processed protein starting at 4 hours post infection (h.p.i) and increased over  
275 the course of infection. The 3C-like protein and its precursors were decreased in CrPV

276 (R146A)-infected cells compared to that of wild-type infection (Fig 3D). The wild-type  
277 and mutant CrPV-1A(R146A) proteins were both expressed and processed to similar  
278 levels during infection. However, upon examining for the presence of a CrPV-1A-2A-2B  
279 fusion protein, we clearly detected a slower migrating band in CrPV(R146A)-infected  
280 cells. This result was similar to that observed in the overexpression and *in vitro*  
281 translation experiments (Fig 3B) and in support of the conclusion that the R146 residue  
282 is required for full CrPV 2A peptide activity.

283

#### 284 **CrPV-1A expression leads to nuclear poly(A)+ RNA accumulation**

285        Besides SG protein markers, poly(A)+ RNA is a key SG marker which contributes  
286 to the structural scaffold for SG assembly (2,10). Although CrPV infection inhibits the  
287 assembly of Rin foci and other SG protein markers, cytoplasmic poly(A)+ RNA foci are  
288 still detected during both wild type and mutant CrPV R146A virus infection (64,69). We  
289 investigated the effect of wild-type and mutant CrPV-1A expression on poly(A)+ RNA by  
290 monitoring poly(A)+ RNA localization using oligo-dT fluorescent *in situ* hybridization  
291 (FISH). In S2 cells transfected with control GFP RNA, the poly(A)+ signal was  
292 distributed in both the nucleus and cytoplasm (Fig 4A-B). Interestingly, S2 cells  
293 expressing wild-type CrPV-1A resulted in enrichment of poly(A)+ RNA signal in the  
294 nucleus. Quantification of the poly(A)+ signal in the nucleus compared to the total  
295 intensity in the cell showed that there is a reproducible difference in the distribution of  
296 the nuclear poly(A)+ signal in the control GFP expressing cells- vs the CrPV-1A-2A-  
297 GFP-transfected cells (Fig 4A-B). By contrast, poly(A)+ RNA was evenly distributed in

298 both the nucleus and cytoplasm in S2 cells expressing mutant CrPV-1A(R146A)-2A-  
299 GFP. In cells expressing CrPV-1A(F114A)-2A-GFP, poly(A)<sup>+</sup> RNA showed nuclear  
300 enrichment, similar to that observed when wild-type CrPV-1A is expressed (Fig 4A-B).  
301 These results suggested that expression of CrPV-1A modulates nuclear event(s) such  
302 as mRNA export or mRNA processing, leading to the accumulation of poly(A)<sup>+</sup> signal in  
303 the nucleus.

304

### 305 **CrPV-1A is localized to the nuclear periphery in CrPV-infected S2 cells**

306 Immunofluorescence analysis of CrPV-1A using anti-CrPV-1A showed that wild-  
307 type protein accumulates in the nucleus (Fig 4A), thus suggesting that the CrPV-1A  
308 nuclear enrichment may be linked to the poly(A)<sup>+</sup> RNA signal in the nucleus. To  
309 investigate this further, we examined CrPV-1A localization in CrPV infected S2 cells by  
310 monitoring Z-stack immunofluorescence confocal images. In wild-type CrPV-infected  
311 cells, CrPV-1A was detected in both the nucleus and cytoplasm with a more enriched  
312 signal around the nuclear periphery (Fig 5A). Co-staining with anti-nuclear lamin  
313 showed overlap with CrPV-1A further supporting that CrPV-1A is located near the  
314 nuclear periphery (Fig 5A). Furthermore, CrPV-1A localization to the nuclear membrane  
315 was observed at all time points during virus infection (Fig S1). In CrPV(R146A)-infected  
316 cells, the CrPV-1A protein was distributed throughout the cell with limited overlap with  
317 nuclear lamin staining (Fig 5B). These results were in line with the conclusion that a  
318 fraction of CrPV-1A is localized to the nuclear periphery in infected cells.

319

### 320 **Transcriptome analysis in CrPV and CrPV (R146A) virus infected S2 cells**

321 Our results suggest that CrPV-1A localizes to the nuclear periphery and induces  
322 poly(A)+ RNA accumulation in the nucleus. Previous studies showed that despite global  
323 transcriptional shutoff, a subset of genes is transcribed in CrPV-infected S2 cells in a  
324 CrPV-1A(R146)-dependent manner (64). To gain further insights, we performed  
325 transcriptome profiling by RNA-seq analysis of wild-type CrPV and CrPV(R146A)-  
326 infected S2 cells at 2 and 4 hours post infection (h.p.i). We removed all the CrPV RNA  
327 reads for downstream analysis. Principal component analyses (PCA) indicate  
328 substantial difference in genes induced during wild-type CrPV infection, whereas  
329 CrPV(R146A) infection induced minimal changes in the gene expression (Fig 6A). We  
330 ranked genes by their standard deviation across the samples and used the top 1000  
331 genes in hierarchical clustering (distance by correlation and average linkage). In  
332 agreement with the PCA analysis, our results suggest that wild-type CrPV, not the  
333 mutant CrPV(R146A)-infection induced substantial changes in steady state RNA levels  
334 (Fig S2).

335 We observed a profound change on global steady state RNA levels in CrPV-  
336 infected cells at both 2 and 4 h.p.i. Specifically, at 2 h.p.i., wild-type CrPV infection  
337 resulted in dramatic changes in steady state RNA levels with 1325 genes showed  
338 increase and 1881 genes showed decrease in steady state RNA levels respectively, by  
339 two-fold compared to mock-infected cells. At 4 h.p.i., the effect became more prominent  
340 with ~2197 genes showed increase and ~2492 genes showed decrease in steady state  
341 RNA levels by two-fold. By contrast, CrPV(R146A) virus infection showed minimal  
342 changes in gene expression with only 25 genes and 175 genes resulting in a 2-fold  
343 increase and 18 and 78 genes showed 2-fold decrease in steady state RNA levels at 2



344 and 4 hours, respectively (Fig 6B-E). Of those that were significantly altered under wild  
345 type virus infection at 4 hours (Fig 6B-D), Gene ontology analysis filtered by molecular  
346 function revealed the upregulated genes are involved in cytoplasmic translation, peptide  
347 metabolic process, enzymatic activity and response to infection whereas the  
348 downregulated genes are involved in molecular functions such as RNA metabolic  
349 process and other macromolecular metabolic processes (Fig 6E).

350 We compared the transcriptome data with previous transcriptome data of S2  
351 cells infected with DCV and flies infected with CrPV or DCV (70,71). 38 out of 71 genes  
352 that were upregulated in flies infected with CrPV showed upregulation and 2 out of 14  
353 genes that were downregulated in flies infected with CrPV showed downregulation in  
354 our dataset. 12 out of 20 genes that are upregulated and 9 out of 19 genes that are  
355 downregulated in DCV infection at 24 hours are upregulated and downregulated  
356 respectively in CrPV infected S2 cells. There was no overlap between all the  
357 transcriptome datasets (Fig 6F). In summary, these results indicated that the CrPV-1A's  
358 R146 residue is essential in modulating the steady-state transcriptome in CrPV-infected  
359 S2 cells.

360

### 361 **Nucleo-cytoplasmic RNA export contributes to virus infection**

362 Our results so far suggest that CrPV-1A modulates nuclear events to inhibit SG  
363 formation, possibly affecting mRNA export as there is an enrichment of poly(A)+ signal  
364 in the nucleus in CrPV-1A expressing cells. The NXF1-p15 heterodimer is a key mRNA  
365 export factor that promotes docking and transport of mRNA across the nuclear  
366 membrane via the nuclear pore complex to the cytoplasm (72). We reasoned that if

367 mRNA export pathway contributes to CrPV infection, then depletion of NXF1, would  
368 affect CrPV infection. Incubation of S2 cells with NXF1 dsRNA but not control GFP  
369 dsRNA resulted in accumulation of nuclear poly(A)<sup>+</sup> mRNA indicating that NXF1  
370 knockdown was efficient in impairing mRNA export (Fig 7A) (73). We then challenged  
371 control or NXF1 knockdown S2 cells with either wild-type CrPV or mutant CrPV R146A  
372 virus infection (MOI 10). In control knockdown cells, CrPV(R146A) infection resulted in a  
373 decrease in viral titre compared to wild-type CrPV infection, as previously reported (64).  
374 By contrast, in NXF1 KD cells, both wild-type and mutant CrPV R146A infection resulted  
375 in ~three-fold increase in viral titer (Fig 7B). These results suggested that mRNA export  
376 pathway contributes to CrPV infection.

377

### 378 **Nup358 is required for stress granule inhibition by CrPV-1A**

379 A CrPV-1A interactome study identified host proteins involved in RNA export  
380 including mTor, GP210, Rae1, Nup88, Nup214 and Nup358 (59). We reasoned that if  
381 the CrPV-1A (R146A) protein is defective in modulating the RNA export pathway,  
382 depletion of these factors would recover mutant CrPV(R146A) virus infection. To  
383 determine if these proteins contribute to CrPV infection, we depleted each mRNA by  
384 RNAi and then monitored wild-type or mutant CrPV(R146A) virus (MOI 1) infection by  
385 immunoblotting for viral VP2 protein expression. Knockdown of Rae1, mTor, Nup88 or  
386 Nup214 did not restore VP2 expression under mutant CrPV(R146A) virus infection  
387 compared to wild-type infection, similar to that observed in the control dsRNA treated  
388 cells (Fig 8A-B). By contrast, in GP210 or Nup358-depleted cells, VP2 expression was  
389 increased in mutant CrPV(R146A) infected cells to a level similar to wild-type CrPV

390 infection, thus suggesting that replication was recovered (Fig 8A-B).

391 To support these findings, we performed qRT-PCR of RNA extracted from wild-  
392 type or mutant CrPV(R146A)-infected cells. As expected, CrPV RNA was reduced in  
393 CrPV R146A-infected cells compared to wild-type infection in control dsRNA treated  
394 cells. Depletion of GP210 resulted in decreased viral RNAs in CrPV(R146A)-infected  
395 cells, similar to the control, indicating a defect in replication (Fig 8C). However, in  
396 Nup358 knockdown cells, similar levels of CrPV RNA were recovered in wild-type and  
397 mutant CrPV(R146A)-infected cells (Fig 8C). These results strongly suggested that  
398 Nup358 is required for CrPV infection in an R146 residue-dependent manner.

399 To determine whether Nup358 promotes mRNA export and whether these  
400 effects are associated with SG formation, we monitored poly(A)<sup>+</sup> RNA by FISH and  
401 arsenite- or pateamine A-induced Rin foci formation in Nup358 dsRNA-treated S2 cells.  
402 Depletion of Nup358 resulted in poly(A)<sup>+</sup> signal in the nucleus (Fig 8D), in line that  
403 Nup358 contributes to mRNA export in *Drosophila* cells (73). Pateamine A treatment of  
404 Nup358-depleted cells resulted in decrease in number of Rin foci per cell (Figure 8D).  
405 Similarly, arsenite treatment of Nup358-depleted cells resulted in a reproducible  
406 decrease in the number of Rin foci per cell by ~40% as compared to control dsRNA  
407 treated cells (Fig S3). These results showed that Nup358 is necessary for Pateamine A  
408 and arsenite stress-induced Rin foci formation in S2 cells.

409

#### 410 **Nup358 is degraded in a proteasome-dependent manner in CrPV-infected cells**

411 Given that the CrPV-1A BC box domain is required for SG inhibition, we next  
412 investigated whether CrPV-1A mediates Nup358 degradation. To follow expression, we

413 generated an antibody raised against *Drosophila* Nup358. Immunoblotting for Nup358  
414 showed a distinct protein band that migrated at >245 kDa, which was not detected in  
415 Nup358 dsRNA treated cells, thus showing specificity of the antibody (Fig 9A). In CrPV-  
416 infected cells, Nup358 protein levels were decreased as compared to mock-infected  
417 cells (Fig 9B). Notably, in mutant CrPV(R146A)-infected S2 cells, Nup358 protein levels  
418 were similar to mock-infected cells, indicating that R146 of CrPV-1A is required for  
419 decreased steady-state levels of Nup358. To determine if Nup358 is degraded by the  
420 proteasome in CrPV-infected cells, we incubated CrPV-infected cells with the pan-  
421 proteasome inhibitor, MG132 (76). Incubating MG132 in CrPV-infected cells led to  
422 slightly decreased VP2 levels as compared to DMSO-treated infected cells, indicating a  
423 minor inhibitory effect on CrPV infection (Fig 9B). By contrast, MG132-treated CrPV  
424 (R146A)-infected cells significantly inhibited VP2 expression, indicating sensitivity to  
425 proteasome inhibition compared to wild-type infection (Fig 9B). Importantly, treating  
426 CrPV-infected cells with MG132 recovered Nup358 protein levels to that of mock-  
427 infected cells, thus demonstrating that Nup358 degradation in CrPV-infected cells is  
428 proteasome-dependent and supports the idea that CrPV-1A directly mediates Nup358  
429 degradation to modulate SG assembly.

## 430 **DISCUSSION**

431 Inhibition of SGs is a general strategy employed by many viruses to facilitate  
432 infection (21). The mechanism and consequences of SG inhibition during virus infection  
433 are not fully understood. In this study, we uncoupled the functions of the multifunctional  
434 CrPV-1A protein and reveal specific domains important for SG inhibition and virus  
435 infection. Specifically, we demonstrated that SG inhibition is dependent on the BC box  
436 domain of CrPV-1A, which recruits the Cul-2-Rbx1-EloBC complex, and acts in concert  
437 with an essential R146 residue to promote infection. We provided insights into this  
438 mechanism by showing that the wild-type CrPV-1A but not mutant CrPV-1A (R146A)  
439 protein, localizes to the nuclear periphery, induces nuclear poly(A)<sup>+</sup> RNA accumulation,  
440 and modulates global transcriptome changes. Finally, we showed that Nup358 is  
441 targeted for degradation by CrPV-1A in a R146-dependent manner. Together, we  
442 propose a novel viral strategy whereby the viral protein CrPV-1A targets Nup358 for  
443 degradation via its R146-containing C-terminal tail and recruitment of the Cul-2-Rbx1-  
444 EloBC complex inhibiting SG formation and RNA transport, consequently leading to poly  
445 (A)<sup>+</sup> mRNA in the nucleus that further contributes to SG inhibition and facilitate  
446 productive virus infection.

447 The effects of the R146A mutation on CrPV-1A's function are illuminating that  
448 point to a nuclear event(s) controlled by CrPV-1A that are likely interdependent. Besides  
449 disrupting CrPV-1A's ability to block SG assembly and Ago-2 activity, the CrPV-1A  
450 protein localizes to the nuclear periphery and mediates poly (A)<sup>+</sup> mRNA nuclear  
451 enrichment and global transcriptome changes under infection (Figures 4-6). As mRNAs

452 act as scaffolds for SG assembly (18,64,69,77), the enrichment of poly (A)+ mRNA in  
453 the nucleus in CrPV-1A expressing cells may serve two purposes: 1) to block global  
454 host mRNA translation and antiviral responses and 2) to deplete mRNA from the  
455 cytoplasm leading to SG inhibition. This viral strategy is reminiscent of other viral  
456 proteins that modulate nuclear events to facilitate SG formation and infection. As  
457 examples, picornavirus 2A protease expression regulates SG assembly and RNA  
458 export (78,79) and influenza virus polymerase-acidic protein-X (PA-X) protein inhibits  
459 SG formation concomitant with cytoplasmic depletion of poly(A) RNA and accumulation  
460 of poly(A) binding protein (PABP) in the nucleus (80). There is also precedent that  
461 modulation of mRNA export can affect SG formation. A recent study showed that  
462 blocking mRNA export pathways with Tubercidin, an adenosine analog, induces SG  
463 formation, likely indirectly regulating cytoplasmic protein synthesis (81). Conversely,  
464 sequestering mRNA export factors into SGs can inhibit nucleocytoplasmic transport  
465 (74). In this study, we present a new paradigm of SG inhibition by a viral protein that  
466 directly modulates nuclear mRNA export.

467         How does CrPV-1A regulate multiple cellular processes? Even though CrPV-1A  
468 is only 166 amino acids in length, there are multiple domains that mediate specific  
469 cellular functions. One of the best-known functions of CrPV-1A is its ability to bind to  
470 Ago-2 via its TALOS domain and degrade Ago-2 by recruiting the Cul-2-Rbx1-EloBC via  
471 its BC Box domain (59). By systematically uncoupling the functions of CrPV-1A via  
472 specific mutations singly or in combination with R146A, we demonstrate that CrPV-1A's  
473 ability to block SG formation is not dependent on its ability to bind to Ago-2 (F114A  
474 mutation) (Fig 3). It is also clear that the TALOS domain does not contribute to CrPV-

475 1A's effects on enrichment of nuclear poly(A)<sup>+</sup> mRNA (Fig 4). However, our results  
476 point to a role of the BC Box domain as mutations within this domain resulted in a deficit  
477 in SG inhibition by CrPV-1A. These results strongly suggest that recruitment of Cul2-  
478 Rbx1-EloBC ubiquitin ligase complex is required for CrPV-1A's effects on SG inhibition.  
479 Further, our results identified Nup358 as a key component in inhibiting SG formation by  
480 CrPV-1A and promoting CrPV infection. Nup358 (also known as RanBP2) is an integral  
481 component of the cytoplasmic filaments of the nuclear pore complex that mediates  
482 nucleocytoplasmic transport of mRNA and protein (73,82). Indeed, depletion of Nup358  
483 in *Drosophila* cells blocks mRNA export from the nucleus (Fig 8) (73). Recent studies  
484 have shown that Nup358 localizes to SGs (74,75). Moreover, Nup358 plays a prominent  
485 role in virus infections. In HIV infected cells, Nup358 facilitates transport of the virus into  
486 the nucleus (83). Additionally, vaccinia virus recruits Nup358 to the viral factories to  
487 enhance virus infection (84). In this study, our model posits that CrPV-1A recruitment of  
488 the Cul2-Rbx1-EloBC ubiquitin ligase complex targets Nup358 for proteasome-  
489 dependent degradation to inhibit mRNA export and subsequently, to block SG formation  
490 (Fig 10). In support of this model, Nup358 levels, which are decreased in CrPV-infected  
491 cells, are recovered in MG132-treated cells and depletion of Nup358 results in inhibition  
492 of stress-induced SG formation (Fig. 7, 8). Moreover, all of these effects are dependent  
493 on the R146 residue within the C-terminal tail of CrPV-1A. The mutant CrPV-1A(R146A)  
494 protein is likely disrupting interactions with Nup358 and other proteins or its altered  
495 subcellular localization (i.e., not nuclear enriched) sequesters it from interacting with  
496 Nup358. Finally, the effects of the R146A mutation may alter protein conformations that  
497 mediate these effects. Our model proposes that the CrPV-1A C-terminal tail interacts

498 directly or indirectly with Nup358 to mediate degradation by the Cul2-Rbx1-EloBC  
499 ubiquitin ligase complex. CrPV-1A acts as a hub that interacts with multiple partners  
500 and through recruitment of the Cul2-Rbx1-EloBC ubiquitin ligase complex leads to  
501 proteasome-dependent degradation (59). It will be of interest to investigate in more  
502 detail of the CrPV-1A/Nup358 interactions and whether ubiquitination of Nup358 is  
503 required for degradation or inactivation. Although the mammalian Nup358 is also a  
504 small ubiquitin-like modifier (SUMO) E3 ligase, that can SUMOylate Ago2 and is linked  
505 to SG dynamics (85–89), however the *Drosophila* Nup358 lacks an obvious sumoylation  
506 domain (73).

507         Besides affecting the above cellular processes, the CrPV-1A R146A mutation  
508 also modulated the CrPV-2A peptide stop-go activity (Fig 2). 2A peptide activity relies  
509 primarily on a conserved DxExNPGP sequence whereby the stop-go peptidyl-tRNA  
510 hydrolysis occurs between the last G and P (60). However, sequences upstream of this  
511 conserved region also contributes to 2A activity (90,91). The R146A mutation, which is  
512 20 amino acids upstream of the "stop-go" cleavage, would still be within the ribosome  
513 exit tunnel during translation and thus, specific peptide-ribosome exit tunnel interactions  
514 likely affects CrPV-2A activity. Although the inhibitory effects on 2A activity is modest  
515 (~2%), it is possible that the expression of the fusion CrPV 1A-2A-2B protein may act in  
516 a dominant manner to the effects observed by CrPV-1A(R146A) expression, an idea  
517 that needs to be examined further.

518         The small CrPV-1A protein employs a multi-prong 'Swiss-army knife' approach to  
519 block the insect antiviral response, transcription, RNA metabolism and SG formation, all



520 of which facilitate infection (64). SGs are "sinks" of RNA and protein that may sequester  
521 viral proteins and RNA that may delay virus infection. For example, the CrPV 3C  
522 protease can localize to SGs (69). SG inhibition is likely a key viral strategy to ensure  
523 viral proteins and RNA are available to promote the viral life cycle. Our previous study  
524 also showed that CrPV-1A can also block SGs in human cells, thus it will be interesting  
525 to determine whether there are common mechanisms for SG inhibition by CrPV-1A  
526 across species (64). Although sequence analysis of the other dicistrovirus 1A proteins  
527 do not show any obvious conservation, it has been shown that some may have similar  
528 functions; the related DCV-1A protein can inhibit the antiviral RNAi pathway through a  
529 distinct mechanism by binding to dsRNA (58). It will be of interest to determine whether  
530 these other dicistrovirus 1A proteins act similarly as CrPV-1A, which may shed light into  
531 the diversity of protein domains that target specific host factors for productive virus  
532 infection. Given the growing global health concerns of arthropod-borne viruses such as  
533 Zika virus, Dengue virus and Chikungunya virus, it will be of importance to further  
534 understand the underlying fundamental virus-host interactions such as stress granule  
535 inhibition in insects in order to develop novel antiviral strategies.

## 536 **MATERIALS AND METHODS**

### 537 **Cell culture and virus infection**

538 *Drosophila* S2 cells (Invitrogen) derived from a primary culture of late-stage  
539 *Drosophila melanogaster* embryo were maintained and passaged in either Shields and  
540 Sang medium (Sigma) or Schneider's medium (Thermo Fisher Scientific) supplemented  
541 with 10% fetal bovine serum (Gibco) and 1X Penicillin-Streptomycin at 25°C.

542 The wild-type and mutant CrPV clones (92) were used to prepare virus stocks  
543 and the stock was expanded by reinfesting naïve cells as described previously (56). S2  
544 cells were infected with wild type or mutant virus at the desired multiplicity of infection in  
545 phosphate buffer saline (PBS) at 25°C. After 30 mins of absorption, complete medium  
546 was added, and cells were harvested at desired time points. Virus titers were  
547 determined by Fluorescence Foci Forming Unit assay using immunofluorescence (anti-  
548 VP2) as previously described (56).

### 549 **Plasmids**

550 The *Drosophila* expression vector pAc 5.1/V5-His B containing CrPV 5'UTR--  
551 GFP-3' UTR, CrPV 5'UTR-1A-GFP-3' UTR was generated using Gibson assembly  
552 (NEB Gibson assembly). The respective mutants were generated using Site directed  
553 mutagenesis. dsRNA targets were selected chosen from Updated Targets of RNAi  
554 Reagents Fly (Flybase) Fragments of candidate genes NXF1 (Accession number:  
555 AJ318090.1;position:2056-2362), GP210 (Accession number: AF322889.1; position:

556 2077-2576), mTor (Accession number: NM\_057719.4; position:462-961),  
557 Rae1.(Accession number: NM\_CP023332.1; position:17547164-17546605) Nup88  
558 (Accession number:AY004880.1; Position: 116-714), Nup214 (Accession number:  
559 NM\_143782.3; Position: 1412-1853), Nup358 (Accession number: NM\_143104.3;  
560 position: 1768-2338) targeting all isoforms with no off targets were used for dsRNA  
561 mediated knockdown. The amplicons were synthesized as gene fragments (Twist  
562 Bioscience) containing a T7 polymerase promoter flanking either side of the amplicon  
563 and directly cloned into a pTOPO plasmid using EcoR1 (NEB). FLuc plasmid was  
564 described previously (59,64). The plasmids were digested with EcoR1, and the digested  
565 and purified products were directly used for *in vitro* transcription reactions. All plasmids  
566 were sequence confirmed by Sanger sequencing (Genewiz).

#### 567 ***In vitro* transcription and translation**

568 T7 polymerase reactions were performed as described previously (93). Briefly 5  
569 µg pAc CrPV 5'UTR-1A-GFP-3' or pCrPV-3 plasmids were linearized with Eco53KI  
570 (NEB) or 5 µg pTOPO dsRNA plasmids with EcoR1 (NEB) in reaction containing 1X T7  
571 buffer (50mM Tris-HCl, 15mM MgCl<sub>2</sub>, 2 µM Spermidine Trihydrochloride, 5 µM DTT), 10  
572 mM NTP mix (NEB), Ribolock (Thermo scientific), 2 units of yeast Inorganic  
573 pyrophosphate (NEB) and T7 Polymerase for 4-6 hours. DNase I (NEB) treated  
574 samples were cleaned up using RNAeasy cleanup kit (Qiagen). GFP RNA was capped  
575 and polyadenylated (Cellsript) and then purified (RNAeasy kit, Qiagen). The integrity of  
576 RNA was verified by denaturing RNA agarose gel electrophoresis. The quantity of RNA  
577 was determined using Nanodrop (Thermo Scientific).

578 *In vitro* translation assays of the wild type or mutant CrPV-1A RNAs were  
579 performed in *Spodoptera frugiperda* 21 (sf-21) insect cell extract (Promega). Briefly, 2  
580 µg RNA was incubated with sf-21 extract in the presence of [<sup>35</sup>S]-Methionine-Cysteine  
581 (Perkin-Elmer >1000Ci/mmol) and F buffer (40mM KOAc. 0.5 mM MgCl<sub>2</sub>) for 2 hrs at  
582 30°C. The resulting translated proteins were resolved by a sodium dodecyl sulfate  
583 (SDS)- polyacrylamide gel electrophoresis (PAGE) gel and analyzed by phosphoimager  
584 analysis (Typhoon, Amersham, GE life sciences).

## 585 **Transfections**

586 For DNA transfections, 1.5 million S2 cells were transfected with 2 µg of plasmid  
587 using Xtreme-GENE HP DNA transfection reagent (Roche) according to the  
588 manufacturer's protocol. Transfected cells were incubated in complete Shields and  
589 Sang medium for 16-24 hours. Transfection of *in vitro* transcribed RNAs in S2 cells  
590 performed using Lipofectamine 2000 (Invitrogen) as described by manufacturers  
591 protocol for 16-24 hours.

## 592 **RNA interference**

593 For dsRNA mediated gene knockdown, 3 million cells were incubated with serum  
594 free medium containing 60 µg dsRNA per well of a 6 well plate for 1 hour at 25°C. The  
595 soaked cells were supplemented with complete medium containing FBS and incubated  
596 for 4 days at 25°C. Cell viability of silenced cells were monitored by Trypan Blue dye  
597 exclusion assay.

## 598 **Immunofluorescence and *in situ* hybridization**

599 Transfected S2 cells transferred to coverslips precoated with 0.5 mg/mL  
600 Concanavalin A (Calbiochem) in 12 well plates for 2 hours. 16-24 hours post  
601 transfection the cells were fixed in 3% w/v paraformaldehyde in PBS, then  
602 permeabilized in PBS containing 0.1% Triton X-100 for 30 minutes and blocked with 2%  
603 BSA for 30 minutes.

604 For *in situ* hybridization, the cells were incubated in hybridization buffer (2X SSC,  
605 20% formamide, 0.2% BSA, 1 µg/µL yeast tRNA) for 15 mins at 37°C and subsequently,  
606 the cells were incubated with 1 mg/mL oligo(dT) conjugated to Cy5 (IDT) overnight at  
607 46°C in hybridization buffer. The next day, the cells were washed with 2X SSC with 20%  
608 formamide twice for 5 min each at 37°C, 2X SSC for 5 min at 37°C, 1X SSC once for 5  
609 min and 1X PBS for 5 min prior to staining with the primary antibodies.

610 The primary antibodies and the dilutions used were as follows: α-CrPV-1A  
611 (1:200), α-Lamin A (1:1000, DGRC), α-Rin (1:500, generous gift from Eric Lecuyer).  
612 Cells were washed three times with PBS and then incubated with secondary antibody  
613 (1:1000 goat anti-rabbit antibody or goat anti-mouse antibody conjugated to Texas Red  
614 and 1:1000 goat anti-mouse antibody conjugated to Alexa Fluor 647 (Life Technologies)  
615 and 1:1000 donkey anti-goat antibody conjugate to Texas Red (Thermo Fisher  
616 Scientific) and Hoechst dye (1:20,000 in PBS, Invitrogen) to stain for nuclei. Coverslips  
617 were mounted on slides with Prolong gold antifade reagent (Invitrogen). The cells were  
618 imaged and analyzed using a Leica SP5 confocal microscope (Leica Microsystems,

619 Wetzlar, Germany) with a 63x objective. Representative images are shown and were  
620 analyzed in ImageJ.

621 Rin granules were counted using Image J using a quantitatively measured  
622 threshold intensity and defined circularity using Image J Intensity measurements were  
623 done using Image J (94). Box plots and graphs generated using GraphPad Prism is  
624 used to represent the data.

### 625 **cDNA synthesis and quantitative real time PCR**

626 Total RNA was extracted from cells using Monarch total RNA Miniprep kit (NEB).  
627 cDNA synthesis was performed using Lunascript™ RT Supermix Kit (NEB) as per  
628 manufacturer's protocol. qRT PCR was performed using Luna Universal qPCR master  
629 mix (NEB) as per manufacturer's protocol. CrPV genome was amplified using; 5'-  
630 CAGTGCCTTACATTGCCA-3' and 5'-AACTTCTACTCGCACTATTC-3' and Rps6 was  
631 amplified using primers 5'-CGATATCCTCGGTGACGAGT-3' and 5' -  
632 CCCTTCTTCAAGACGACCAG-3'

### 633 **Western Blot analysis**

634 S2 cells were washed with PBS and harvested in RIPA buffer (150 mM NaCl, 1%  
635 IGEPAL CA-630, 0.5% sodium deoxycholate, 0.1% SDS, 10% glycerol, 50 mM Tris-HCl,  
636 pH 8.0 and protease inhibitor cocktail (Roche)). Protein samples that were collected from  
637 freeze thawing for three times were spun down at 13,000 rpm for 15 minutes at 4°C and  
638 the supernatants were collected as the total protein extracts. Protein concentration was  
639 determined by Bradford assay (Biorad). Equal amounts (in micrograms) of lysates were

640 separated on 4-15% SDS-PAGE gel and transferred to Polyvinylidene difluoride (PVDF)  
641 membrane (Millipore). Subsequently, the membranes were blocked for 30 mins in 5%  
642 skim milk and TBS-T (20mM Tris, 150mM NaCl, 0.1% Tween-20) and probed with primary  
643 antibody for 1 hour.

644 The dilutions and primary antibodies used were as follows:  $\alpha$ -CrPV-1A (1:1000),  
645  $\alpha$ -GFP (1:1000, Roche).  $\alpha$ -CrPV-VP2 (1:1000, Genscript),  $\alpha$ -CrPV-3C (1:1000, (raised  
646 against CrPV-3C peptide sequence NH<sub>2</sub>-CTDMFDYSESYTQR-C), Genscript),  $\alpha$ -CrPV-  
647 Nup358 (1:1000. raised against Nup358 peptide sequence NH<sub>2</sub>-CGSTDKSEPGKDAGP-  
648 C), Genscript),  $\alpha$ -Tubulin (1:1000, DSHB). Membranes were washed with TBS-T for three  
649 times and incubated with secondary antibodies for 1 hour at room temperature. Following  
650 secondary antibodies were used: IRDye 800CW goat-anti-rabbit IgG or IRDye 680CW  
651 goat anti-mouse at 1:5000 (LI-COR Biosciences). Membranes were washed with TBS-T  
652 for three times and Protein bands were detected and quantified using the Odyssey  
653 Infrared Imaging System (LI-COR Biosciences). Alternatively, 1:5,000 dilution of donkey  
654 anti-rabbit IgG-horseradish peroxidase (Amersham) or a 1:5,000 dilution of goat anti-  
655 mouse IgG-horseradish peroxidase (Santa Cruz Biotechnology) was used to detect  
656 proteins by enhanced chemiluminescence (Thermo Scientific).

### 657 **RNA seq: sample preparation, library generation and analysis**

658 S2 cells ( $1.5 \times 10^7$ ) were infected with wild-type or R146A mutant CrPV at an  
659 MOI 3. Total RNA was extracted from mock or virus infected cells using Trizol reagent  
660 (Invitrogen) at 2 and 4 hours post infection. The samples were treated with DNase I for  
661 1 hour at 37<sup>0</sup> C and were re-extracted using Trizol. The RNA integrity was verified by

662 denaturing gel analysis. Polyadenylated RNA was isolated using NEBNext poly(A)  
663 mRNA isolation module and the quality and quantity of RNA were determined by  
664 electrophoresis on the bioanalyzer (Agilent). NEBNext Ultra™ II DNA library prep kit  
665 was used to generate libraries. Size selection was performed on adaptor ligated  
666 libraries using agarose gel, generating cDNA libraries size ranging from 150-275  
667 nucleotides. The enriched libraries were purified using QIAquick purification column.

668 Sequencing of a pool of multiplexes libraries were performed on an Illumina  
669 HiSeq 4000 PE100 Platform (Génome Québec). At least 19 million reads were  
670 generated from each sample. Libraries, sequencing, and quality control of the  
671 sequencing were performed by the Nanq facility at Génome Québec.

672 Reads were trimmed based on quality using the default parameters of  
673 Trimmomatic and assessed using FastQC as part of Unipro UGENE v1.29 (95,96). and  
674 mapped to the *Drosophila melanogaster* genome using default paired-end parameters  
675 of Bowtie2 as part of UGENE. Reads mapping to the CrPV genome were removed for  
676 downstream analysis to maintain normalization based only on total host gene transcript  
677 numbers. Reads were mapped to the *D. melanogaster* transcriptome and quantified  
678 using the quasi-mapper Salmon 1.8.0 (97). Differentially expressed genes were  
679 identified using iDEP 0.92 (<http://bioinformatics.sdstate.edu/idep92/>) and the  
680 Bioconductor package DESeq2. used for heatmap visualization with Integrated  
681 differential expression and pathway analysis (iDEP) (98).

682 The raw sequencing data was submitted under Gene expression accession  
683 number PRJNA771107. Venn diagrams for the comparison of different gene expression



684 data were generated using InteractiveVenn (99). Network analysis of gene ontologies  
685 was performed using ClueGo v2.5.6 (100) as part of Cytoscape v3.7.2 (101) using the  
686 EBI-UniProt-GOA Molecular Function database (17.02.2020).

### 687 **Anti-CrPV-1A Polyclonal antibody**

688 DNA fragment encoding the full length CrPV-1A gene was cloned into pet28b  
689 vector using NdeI and XhoI enzymes and the resultant construct with C terminal His-tag  
690 was used for protein expression in *E. coli* BL21DE3 cells (modified from (63)).  
691 Expression of CrPV-1A protein was carried out in *E. coli* (BL21DE3) cells grown in  
692 Terrific broth medium at 16°C overnight. induced with 0.5 mM Isopropyl-β-D-  
693 thiogalactoside (IPTG). The soluble protein was purified using Ni-NTA Agarose beads  
694 (Quiagen) in a buffer containing 30 mM HEPES-KOH pH 7.4, 100 mM KOAc, 2 mM  
695 Mg(Ac)<sub>2</sub>, 300 mM Imidazole, 10% glycerol, 1 mM DTT with complete mini EDTA free  
696 protease inhibitor tablet. The purified samples were dialyzed and further analyzed over  
697 a superdex 50 gel filtration column equilibrated with exchange buffer (30 mM HEPES-  
698 KOH pH 7.4, 100 mM KOAc, 2mM Mg(OAc)<sub>2</sub>, 10% Glycerol, 1mM DTT). All purified  
699 proteins were flash-frozen in liquid nitrogen and stored at -80°C. The polyclonal  
700 antibody against CrPV-1A in rabbits was generated by Genscript. USA.

## 702 REFERENCES

- 703 1. Protter DSW, Parker R. Principles and Properties of Stress Granules. Trends Cell  
704 Biol. 2016;26(9):668–79.
- 705 2. Kedersha NL, Gupta M, Li W, Miller I, Anderson P. RNA-binding proteins TIA-1  
706 and TIAR link the phosphorylation of eIF-2 $\alpha$  to the assembly of mammalian stress  
707 granules. J Cell Biol. 1999 Dec 27;147(7):1431–41.
- 708 3. Kedersha N, Anderson P. Stress granules: Sites of mRNA triage that regulate  
709 mRNA stability and translatability. In: Biochemical Society Transactions. 2002. p.  
710 963–9.
- 711 4. Reineke LC, Dougherty JD, Pierre P, Lloyd RE. Large G3BP-induced granules  
712 trigger eIF2 $\alpha$  phosphorylation. Mol Biol Cell. 2012 Sep 15;23(18):3499–510.
- 713 5. Buchan JR, Parker R. Eukaryotic Stress Granules : The Ins and Out of Translation  
714 What are Stress Granules ? Mol Cell. 2009;36(6):932.
- 715 6. Jain S, Wheeler JR, Walters RW, Agrawal A, Barsic A, Parker R. ATPase-  
716 Modulated Stress Granules Contain a Diverse Proteome and Substructure. Cell.  
717 2016 Jan 28;164(3):487–98.
- 718 7. Youn J-Y, Dunham WH, Hong J, Fabian M, Cô J-FO, Gingras A-C. High-Density  
719 Proximity Mapping Reveals the Subcellular Organization of mRNA-Associated  
720 Granules and Bodies. Mol Cell. 2018;69:517–32.

- 721 8. Padrón A, Iwasaki S, Ingolia NT. Proximity RNA Labeling by APEX-Seq Reveals  
722 the Organization of Translation Initiation Complexes and Repressive RNA  
723 Granules. *Mol Cell*. 2019 Aug 22;75(4):875-887.e5.
- 724 9. Anderson P, Kedersha N. RNA granules. *J Cell Biol*. 2006 Mar 13;172(6):803–8.
- 725 10. Khong A, Matheny T, Jain S, Mitchell SF, Wheeler JR, Parker R. The Stress  
726 Granule Transcriptome Reveals Principles of mRNA Accumulation in Stress  
727 Granules. *Mol Cell*. 2017 Nov 16;68(4):808-820.e5.
- 728 11. Kedersha N, Ivanov P, Anderson P. Stress granules and cell signaling: More than  
729 just a passing phase? Vol. 38, *Trends in Biochemical Sciences*. Elsevier Current  
730 Trends; 2013. p. 494–506.
- 731 12. Mahboubi H, Stochaj U. Cytoplasmic stress granules: Dynamic modulators of cell  
732 signaling and disease. *Biochim Biophys Acta - Mol Basis Dis*. 2017 Apr  
733 1;1863(4):884–95.
- 734 13. Hershey JWB. Translational Control in Mammalian Cells. *Annu Rev Biochem*.  
735 1991 Jun 28;60(1):717–55.
- 736 14. Wek SA, Zhu S, Wek RC. The histidyl-tRNA synthetase-related sequence in the  
737 eIF-2 alpha protein kinase GCN2 interacts with tRNA and is required for activation  
738 in response to starvation for different amino acids. *Mol Cell Biol*. 1995 Aug  
739 1;15(8):4497–506.

- 740 15. Srivastava SP, Kumar KU, Kaufman RJ. Phosphorylation of eukaryotic translation  
741 initiation factor 2 mediates apoptosis in response to activation of the double-  
742 stranded RNA-dependent protein kinase. *J Biol Chem*. 1998 Jan 23;273(4):2416–  
743 23.
- 744 16. Harding HP, Novoa I, Zhang Y, Zeng H, Wek R, Schapira M, et al. Regulated  
745 translation initiation controls stress-induced gene expression in mammalian cells.  
746 *Mol Cell*. 2000 Nov 1;6(5):1099–108.
- 747 17. Lu L, Han A-P, Chen J-J. Translation Initiation Control by Heme-Regulated  
748 Eukaryotic Initiation Factor 2 $\alpha$  Kinase in Erythroid Cells under Cytoplasmic  
749 Stresses. *Mol Cell Biol*. 2001 Dec 1;21(23):7971–80.
- 750 18. Farny NG, Kedersha NL, Silver PA. Metazoan stress granule assembly is  
751 mediated by P-eIF2 $\alpha$ -dependent and -independent mechanisms. *RNA*. 2009  
752 Oct;15(10):1814–21.
- 753 19. Kedersha N, Chen S, Gilks N, Li W, Miller IJ, Stahl J, et al. Evidence that ternary  
754 complex (eIF2-GTP-tRNA<sup>iMet</sup>)-Deficient preinitiation complexes are core  
755 constituents of mammalian stress granules. *Mol Biol Cell*. 2002 Dec 7;13(1):195–  
756 210.
- 757 20. Mokaš S, Mills JR, Garreau C, Fournier MJ, Robert F, Arya P, et al. Uncoupling  
758 stress granule assembly and translation initiation inhibition. *Mol Biol Cell*. 2009  
759 Jun 1;20(11):2673–83.

- 760 21. McCormick C, Khaperskyy DA. Translation inhibition and stress granules in the  
761 antiviral immune response. Vol. 17, Nature Reviews Immunology. Nature  
762 Publishing Group; 2017. p. 647–60.
- 763 22. Eiermann N, Haneke K, Sun Z, Stoecklin G, Ruggieri A. Dance with the Devil:  
764 Stress Granules and Signaling in Antiviral Responses. Viruses 2020, Vol 12,  
765 Page 984. 2020 Sep 4;12(9):984.
- 766 23. White JP, Cardenas AM, Marissen WE, Lloyd RE. Inhibition of Cytoplasmic  
767 mRNA Stress Granule Formation by a Viral Proteinase. Cell Host Microbe. 2007  
768 Nov 15;2(5):295–305.
- 769 24. Ariumi Y, Kuroki M, Kushima Y, Osugi K, Hijikata M, Maki M, et al. Hepatitis C  
770 Virus Hijacks P-Body and Stress Granule Components around Lipid Droplets. J  
771 Virol. 2011 Jul 15;85(14):6882–92.
- 772 25. Nakagawa K, Narayanan K, Wada M, Makino S. Inhibition of Stress Granule  
773 Formation by Middle East Respiratory Syndrome Coronavirus 4a Accessory  
774 Protein Facilitates Viral Translation, Leading to Efficient Virus Replication. J Virol.  
775 2018 Aug 1;92(20).
- 776 26. Khaperskyy DA, Hatchette TF, McCormick C. Influenza A virus inhibits  
777 cytoplasmic stress granule formation. FASEB J. 2012 Apr 27;26(4):1629–39.
- 778 27. Rabouw HH, Langereis MA, Knaap RCM, Dalebout TJ, Canton J, Sola I, et al.  
779 Middle East Respiratory Coronavirus Accessory Protein 4a Inhibits PKR-Mediated

- 780 Antiviral Stress Responses. Frieman MB, editor. PLOS Pathog. 2016 Oct  
781 26;12(10):e1005982.
- 782 28. Simpson-Holley M, Kedersha N, Dower K, Rubins KH, Anderson P, Hensley LE,  
783 et al. Formation of Antiviral Cytoplasmic Granules during Orthopoxvirus Infection.  
784 J Virol. 2011 Feb 15;85(4):1581–93.
- 785 29. Sharma NR, Majerciak V, Kruhlak MJ, Zheng ZM. KSHV inhibits stress granule  
786 formation by viral ORF57 blocking PKR activation. PLoS Pathog. 2017 Oct  
787 1;13(10):e1006677.
- 788 30. Ye X, Pan T, Wang D, Fang L, Ma J, Zhu X, et al. Foot-and-mouth disease virus  
789 counteracts on internal ribosome entry site suppression by G3BP1 and inhibits  
790 G3BP1-mediated stress granule assembly via post-translational mechanisms.  
791 Front Immunol. 2018 May 25;9(MAY):25.
- 792 31. Visser LJ, Medina GN, Rabouw HH, de Groot RJ, Langereis MA, de los Santos T,  
793 et al. Foot-and-Mouth Disease Virus Leader Protease Cleaves G3BP1 and  
794 G3BP2 and Inhibits Stress Granule Formation. J Virol. 2019 Nov 7;93(2).
- 795 32. Emara MM, Brinton MA. Interaction of TIA-1/TIAR with West Nile and dengue  
796 virus products in infected cells interferes with stress granule formation and  
797 processing body assembly. Proc Natl Acad Sci U S A. 2007 May  
798 22;104(21):9041–6.
- 799 33. Bonenfant G, Williams N, Netzband R, Schwarz MC, Evans MJ, Pager CT. Zika

- 800 Virus Subverts Stress Granules To Promote and Restrict Viral Gene Expression.  
801 J Virol. 2019 Apr 3;93(12).
- 802 34. Rao S, Hassine S, Monette A, Amorim R, Desgroseillers L, Mouland AJ. HIV-1  
803 requires Staufen1 to dissociate stress granules and to produce infectious viral  
804 particles. RNA. 2019 Jun 1;25(6):727–36.
- 805 35. Brocard M, Iadevaia V, Klein P, Hall B, Lewis G, Lu J, et al. Norovirus infection  
806 results in eIF2 $\alpha$  independent host translation shut-off and remodels the G3BP1  
807 interactome evading stress granule formation. PLoS Pathog.  
808 2020;16(1):e1008250.
- 809 36. Luo L, Li Z, Zhao T, Ju X, Ma P, Jin B, et al. SARS-CoV-2 nucleocapsid protein  
810 phase separates with G3BPs to disassemble stress granules and facilitate viral  
811 production. Sci Bull. 2021 Jan 19;
- 812 37. Nabeel-Shah S, Lee H, Ahmed N, Burke GL, Farhangmehr S, Ashraf K, et al.  
813 SARS-CoV-2 nucleocapsid protein binds host mRNAs and attenuates stress  
814 granules to impair host stress response. iScience. 2022 Jan 21;25(1).
- 815 38. Zheng ZQ, Wang SY, Xu ZS, Fu YZ, Wang YY. SARS-CoV-2 nucleocapsid  
816 protein impairs stress granule formation to promote viral replication. Cell Discov  
817 2021 71. 2021 May 25;7(1):1–11.
- 818 39. Basu M, Brinton MA. How do flavivirus-infected cells resist arsenite-induced  
819 stress granule formation? Future Virol. 2017 Jun 1;12(6):247.

- 820 40. Onomoto K, Yoneyama M, Fung G, Kato H, Fujita T. Antiviral innate immunity and  
821 stress granule responses. Vol. 35, Trends in Immunology. Elsevier Ltd; 2014. p.  
822 420–8.
- 823 41. Langereis MA, Feng Q, van Kuppeveld FJ. MDA5 Localizes to Stress Granules,  
824 but This Localization Is Not Required for the Induction of Type I Interferon. J Virol.  
825 2013 Jun 1;87(11):6314–25.
- 826 42. Oh S-W, Onomoto K, Wakimoto M, Onoguchi K, Ishidate F, Fujiwara T, et al.  
827 Leader-Containing Uncapped Viral Transcript Activates RIG-I in Antiviral Stress  
828 Granules. Weber F, editor. PLOS Pathog. 2016 Feb 10;12(2):e1005444.
- 829 43. Reineke LC, Lloyd RE. The stress granule protein G3BP1 recruits protein kinase  
830 R to promote multiple innate immune antiviral responses. J Virol. 2015  
831 Mar;89(5):2575–89.
- 832 44. Arimoto K, Fukuda H, Imajoh-Ohmi S, Saito H, Takekawa M. Formation of stress  
833 granules inhibits apoptosis by suppressing stress-responsive MAPK pathways.  
834 Nat Cell Biol. 2008;10(11):1324–32.
- 835 45. Warsaba R, Sadasivan J, Jan E. Dicistrovirus-Host Molecular Interactions. Curr  
836 Issues Mol Biol. 2020;34:83–112.
- 837 46. Bonning BC, Miller WA. Dicistroviruses. Vol. 55, Annual Review of Entomology.  
838 2010. p. 129–50.



- 839 47. Lightner DV. Epizootiology, distribution and the impact on international trade of  
840 two penaeid shrimp viruses in the Americas. Rev Sci Tech l'OIE. 1996 Jun  
841 1;15(2):579–601.
- 842 48. Wilson JE, Powell MJ, Hoover SE, Sarnow P. Naturally Occurring Dicistronic  
843 Cricket Paralysis Virus RNA Is Regulated by Two Internal Ribosome Entry Sites.  
844 Mol Cell Biol. 2000 Jul 15;20(14):4990–9.
- 845 49. Jan E, Thompson SR, Wilson JE, Pestova T V., Hellen CUT, Sarnow P. Initiator  
846 Met-tRNA-independent translation mediated by an internal ribosome entry site  
847 element in cricket paralysis virus-like insect viruses. Cold Spring Harb Symp  
848 Quant Biol. 2001;66:285–92.
- 849 50. Wilson JE, Pestova T V., Hellen CUT, Sarnow P. Initiation of Protein Synthesis  
850 from the A Site of the Ribosome. Cell. 2000 Aug 18;102(4):511–20.
- 851 51. Sasaki J, Nakashima N. Methionine-independent initiation of translation in the  
852 capsid protein of an insect RNA virus. Proc Natl Acad Sci U S A. 2000 Feb  
853 15;97(4):1512–5.
- 854 52. Fernández IS, Bai XC, Murshudov G, Scheres SHW, Ramakrishnan V. Initiation  
855 of translation by cricket paralysis virus IRES requires its translocation in the  
856 ribosome. Cell. 2014 May 8;157(4):823–31.
- 857 53. Gross L, Vicens Q, Einhorn E, Noireterre A, Schaeffer L, Kuhn L, et al. The  
858 IRES5'UTR of the dicistrovirus cricket paralysis virus is a type III IRES containing

- 859 an essential pseudoknot structure. *Nucleic Acids Res.* 2017 Sep 1;45(15):8993–  
860 9004.
- 861 54. Neupane R, Pisareva VP, Rodriguez CF, Pisarev A V., Fernández IS. A complex  
862 ires at the 5'-utr of a viral mrna assembles a functional 48s complex via an uaug  
863 intermediate. *Elife.* 2020 Apr 1;9.
- 864 55. Terenin IM, Dmitriev SE, Andreev DE, Royall E, Belsham GJ, Roberts LO, et al. A  
865 Cross-Kingdom Internal Ribosome Entry Site Reveals a Simplified Mode of  
866 Internal Ribosome Entry. *Mol Cell Biol.* 2005 Sep;25(17):7879–88.
- 867 56. Garrey JL, Lee Y-Y, Au HHT, Bushell M, Jan E. Host and Viral Translational  
868 Mechanisms during Cricket Paralysis Virus Infection. *J Virol.* 2010 Jan  
869 15;84(2):1124–38.
- 870 57. Khong A, Bonderoff JM, Spriggs R V., Tammpere E, Kerr CH, Jackson TJ, et al.  
871 Temporal regulation of distinct internal ribosome entry sites of the dicistroviridae  
872 cricket paralysis virus. *Viruses.* 2016 Jan 19;8(1).
- 873 58. Nayak A, Berry B, Tassetto M, Kunitomi M, Acevedo A, Deng C, et al. Cricket  
874 paralysis virus antagonizes Argonaute 2 to modulate antiviral defense in  
875 *Drosophila*. *Nat Struct Mol Biol.* 2010 May;17(5):547–54.
- 876 59. Nayak A, Kim DY, Trnka MJ, Kerr CH, Lidsky P V., Stanley DJ, et al. A Viral  
877 Protein Restricts *Drosophila* RNAi Immunity by Regulating Argonaute Activity and  
878 Stability. *Cell Host Microbe.* 2018 Oct 10;24(4):542-557.e9.

- 879 60. Luke GA, de Felipe P, Lukashev A, Kallioinen SE, Bruno EA, Ryan MD.  
880 Occurrence, function and evolutionary origins of “2A-like” sequences in virus  
881 genomes. *J Gen Virol.* 2008 Apr;89(4):1036–42.
- 882 61. Van Rij RP, Saleh MC, Berry B, Foo C, Houk A, Antoniewski C, et al. The RNA  
883 silencing endonuclease Argonaute 2 mediates specific antiviral immunity in  
884 *Drosophila melanogaster*. *Genes Dev.* 2006 Nov 1;20(21):2985–95.
- 885 62. Wang XH, Aliyari R, Li WX, Li HW, Kim K, Carthew R, et al. RNA interference  
886 directs innate immunity against viruses in adult *Drosophila*. *Science* (80- ). 2006  
887 Apr 21;312(5772):452–4.
- 888 63. Watanabe M, Iwakawa HO, Tadakuma H, Tomari Y. Biochemical and single-  
889 molecule analyses of the RNA silencing suppressing activity of CrPV-1A. *Nucleic*  
890 *Acids Res.* 2017 Oct 1;45(18):10837–44.
- 891 64. Khong A, Kerr CH, Yeung CHL, Keatings K, Nayak A, Allan DW, et al. Disruption  
892 of Stress Granule Formation by the Multifunctional Cricket Paralysis Virus 1A  
893 Protein. *J Virol.* 2017;91(5).
- 894 65. Dang Y, Kedersha N, Low WK, Romo D, Gorospe M, Kaufman R, et al.  
895 Eukaryotic initiation factor 2 $\alpha$ -independent pathway of stress granule induction by  
896 the natural product pateamine A. *J Biol Chem.* 2006 Oct 27;281(43):32870–8.
- 897 66. Mazroui R, Sukarieh R, Bordeleau ME, Kaufman RJ, Northcote P, Tanaka J, et al.  
898 Inhibition of ribosome recruitment induces stress granule formation independently

- 899 of eukaryotic initiation factor 2 $\alpha$  phosphorylation. *Mol Biol Cell*. 2006 Jul  
900 26;17(10):4212–9.
- 901 67. Bordeleau ME, Matthews J, Wojnar JM, Lindqvist L, Novac O, Jankowsky E, et al.  
902 Stimulation of mammalian translation initiation factor eIF4A activity by a small  
903 molecule inhibitor of eukaryotic translation. *Proc Natl Acad Sci U S A*. 2005 Jul  
904 26;102(30):10460–5.
- 905 68. Irvine K, Stirling R, Hume D, Kennedy D. Rasputin, more promiscuous than ever:  
906 A review of G3BP. Vol. 48, *International Journal of Developmental Biology*. 2004.  
907 p. 1065–77.
- 908 69. Khong A, Jan E. Modulation of Stress Granules and P Bodies during Dicrostovirus  
909 Infection. *J Virol*. 2011 Feb 15;85(4):1439–51.
- 910 70. Merklings SH, Overheul GJ, Van Mierlo JT, Arends D, Gilissen C, Van Rij RP. The  
911 heat shock response restricts virus infection in *Drosophila*. *Sci Rep*. 2015 Aug  
912 3;5:12758.
- 913 71. Dostert C, Jouanguy E, Irving P, Troxler L, Galiana-Arnoux D, Hetru C, et al. The  
914 Jak-STAT signaling pathway is required but not sufficient for the antiviral  
915 response of *Drosophila*. *Nat Immunol* 2005 69. 2005 Aug 7;6(9):946–53.
- 916 72. Björk P, Wieslander L. Mechanisms of mRNA export. Vol. 32, *Seminars in Cell  
917 and Developmental Biology*. Elsevier Ltd; 2014. p. 47–54.

- 918 73. Forler D, Rabut G, Ciccarelli FD, Herold A, Köcher T, Niggeweg R, et al.  
919 RanBP2/Nup358 Provides a Major Binding Site for NXF1-p15 Dimers at the  
920 Nuclear Pore Complex and Functions in Nuclear mRNA Export. *Mol Cell Biol*.  
921 2004 Feb 1;24(3).
- 922 74. Zhang K, Daigle JG, Cunningham KM, Coyne AN, Ruan K, Grima JC, et al.  
923 Stress Granule Assembly Disrupts Nucleocytoplasmic Transport. *Cell*. 2018 May  
924 3;173(4):958-971.e17.
- 925 75. Lee J, Luu Le LTH, Kim E, Lee MJ. Formation of Non-Nucleoplasmic Proteasome  
926 Foci during the Late Stage of Hyperosmotic Stress. *Cells*. 2021 Sep 1;10(9).
- 927 76. DH L, AL G. Proteasome inhibitors: valuable new tools for cell biologists. *Trends*  
928 *Cell Biol*. 1998 Oct 1;8(10):397–403.
- 929 77. Campos-Melo D, Hawley ZCE, Droppelmann CA, Strong MJ. The Integral Role of  
930 RNA in Stress Granule Formation and Function. *Front Cell Dev Biol*. 2021 May  
931 20;9.
- 932 78. Castelló A, Izquierdo JM, Welnowska E, Carrasco L. RNA nuclear export is  
933 blocked by poliovirus 2A protease and is concomitant with nucleoporin cleavage.  
934 *J Cell Sci*. 2009 Oct 15;122(20):3799–809.
- 935 79. Yang X, Hu Z, Fan S, Zhang Q, Zhong Y, Guo D, et al. Picornavirus 2A protease  
936 regulates stress granule formation to facilitate viral translation. Sarnow P, editor.  
937 *PLOS Pathog*. 2018 Feb 7;14(2):e1006901.

- 938 80. Khaperskyy DA, Emara MM, Johnston BP, Anderson P, Hatchette TF, McCormick  
939 C. Influenza A Virus Host Shutoff Disables Antiviral Stress-Induced Translation  
940 Arrest. Pekosz A, editor. PLoS Pathog. 2014 Jul 10;10(7):e1004217.
- 941 81. Hochberg-Laufer H, Schwed-Gross A, Neugebauer KM, Shav-Tal Y. Uncoupling  
942 of nucleo-cytoplasmic RNA export and localization during stress. Nucleic Acids  
943 Res. 2019 May 21;47(9):4778–97.
- 944 82. TC W, HS P, VC C, MW G, TD A, IW M, et al. The cytoplasmic filaments of the  
945 nuclear pore complex are dispensable for selective nuclear protein import. J Cell  
946 Biol. 2002 Jul 8;158(1):63–77.
- 947 83. Dharan A, Talley S, Tripathi A, Mamede JI, Majetschak M, Hope TJ, et al. KIF5B  
948 and Nup358 Cooperatively Mediate the Nuclear Import of HIV-1 during Infection.  
949 PLOS Pathog. 2016 Jun 1;12(6):e1005700.
- 950 84. Khuperkar D, Kamble A, Singh A, Ghate A, Nawadkar R, Sahu A, et al. Selective  
951 recruitment of nucleoporins on vaccinia virus factories and the role of Nup358 in  
952 viral infection. Virology. 2017 Dec 1;512:151–60.
- 953 85. Marmor-Kollet H, Siany A, Kedersha N, Knafo N, Rivkin N, Danino YM, et al.  
954 Spatiotemporal Proteomic Analysis of Stress Granule Disassembly Using APEX  
955 Reveals Regulation by SUMOylation and Links to ALS Pathogenesis. Mol Cell.  
956 2020 Dec 3;80(5):876-891.e6.
- 957 86. Zhang H, Mahadevan K, Palazzo AF. Sumoylation is Required for the

- 958 Cytoplasmic Accumulation of a Subset of mRNAs. *Genes (Basel)*. 2014;5:982–  
959 1000.
- 960 87. J J, RA B, SJ M, FZ W. Sumoylation of eIF4A2 affects stress granule formation. *J*  
961 *Cell Sci*. 2016 Jun 15;129(12):2407–15.
- 962 88. Shen Q, Wang YE, Truong M, Mahadevan K, Wu JJ, Zhang H, et al.  
963 RanBP2/Nup358 enhances miRNA activity by sumoylating Argonautes. *PLOS*  
964 *Genet*. 2021 Feb 18;17(2):e1009378.
- 965 89. Pichler A, Gast A, Seeler JS, Dejean A, Melchior F. The nucleoporin RanBP2 has  
966 SUMO1 E3 ligase activity. *Cell*. 2002 Jan 11;108(1):109–20.
- 967 90. Sharma P, Yan F, Doronina VA, Escuin-Ordinas H, Ryan MD, Brown JD. 2A  
968 peptides provide distinct solutions to driving stop-carry on translational recoding.  
969 *Nucleic Acids Res*. 2012 Apr 1;40(7):3143–51.
- 970 91. Donnelly MLL, Hughes LE, Luke G, Mendoza H, Ten Dam E, Gani D, et al. The  
971 “cleavage” activities of foot-and-mouth disease virus 2A site-directed mutants and  
972 naturally occurring “2A-like” sequences. *J Gen Virol*. 2001;82(5):1027–41.
- 973 92. Kerr CH, Wang QS, Keatings K, Khong A, Allan D, Yip CK, et al. The 5’  
974 Untranslated Region of a Novel Infectious Molecular Clone of the Dicrostovirus  
975 Cricket Paralysis Virus Modulates Infection. *J Virol*. 2015 Jun 1;89(11):5919–34.
- 976 93. Wang QS, Jan E. Switch from Cap- to Factorless IRES-Dependent 0 and +1

- 977 Frame Translation during Cellular Stress and Dicistrovirus Infection. Preiss T,  
978 editor. PLoS One. 2014 Aug 4;9(8):e103601.
- 979 94. Schneider CA, Rasband WS, Eliceiri KW. NIH Image to ImageJ: 25 years of  
980 image analysis. Vol. 9, Nature Methods. Nature Publishing Group; 2012. p. 671–  
981 5.
- 982 95. Okonechnikov K, Golosova O, Fursov M. Unipro UGENE: a unified bioinformatics  
983 toolkit. Bioinformatics. 2012 Apr 15;28(8):1166–7.
- 984 96. Golosova O, Henderson R, Vaskin Y, Gabrielian A, Grekhov G, Nagarajan V, et  
985 al. Unipro UGENE NGS pipelines and components for variant calling, RNA-seq  
986 and ChIP-seq data analyses. PeerJ. 2014 Nov 4;2014(1):e644.
- 987 97. Patro R, Duggal G, Love MI, Irizarry RA, Kingsford C. Salmon provides fast and  
988 bias-aware quantification of transcript expression. Nat Methods. 2017 Mar  
989 6;14(4):417–9.
- 990 98. Ge SX, Son EW, Yao R. iDEP: An integrated web application for differential  
991 expression and pathway analysis of RNA-Seq data. BMC Bioinformatics.  
992 2018;19(1):1–24.
- 993 99. Heberle H, Meirelles VG, da Silva FR, Telles GP, Minghim R. InteractiVenn: A  
994 web-based tool for the analysis of sets through Venn diagrams. BMC  
995 Bioinformatics. 2015 May 22;16(1):169.



996 100. Bindea G, Mlecnik B, Hackl H, Charoentong P, Tosolini M, Kirilovsky A, et al.  
997 ClueGO: A Cytoscape plug-in to decipher functionally grouped gene ontology and  
998 pathway annotation networks. *Bioinformatics*. 2009;25(8):1091–3.

999 101. Shannon P, Markiel A, Ozier O, Baliga NS, Wang JT, Ramage D, et al.  
1000 Cytoscape: A software Environment for integrated models of biomolecular  
1001 interaction networks. *Genome Res*. 2003 Nov;13(11):2498–504.

1002

1003

1004

1005

1006

1007

1008

1009

1010

1011

1012

## 1013 **FIGURE LEGENDS**

### 1014 **Figure 1 CrPV-1A expression inhibits stress granules in response to arsenite**

1015 **treatment.** (A) Depiction of the CrPV genome with the structure of CrPV-1A protein  
1016 (PDB 6C3R) (*below*) highlighting the domains selected for mutagenesis. (B) Schematic  
1017 of CrPV-1A-2A-GFP RNA containing the CrPV 5' and 3'UTRs. (C) Confocal  
1018 immunofluorescence images of S2 cells transfected with control 5'cap-GFP-poly (A)+,  
1019 wild type or R146A mutant CrPV-1A-2A-GFP RNAs (16 hours) followed by one-hour  
1020 treatment in the presence or absence of 500  $\mu$ M sodium arsenite. The arrows show  
1021 transfected cells. Shown are representative transfected cells detecting GFP  
1022 fluorescence (green), Rin antibody staining (red), Hoechst dye staining for nucleus  
1023 (blue) and merged images. Images were taken using the Leica Sp5 confocal  
1024 microscope with a 63X objective lens and 2X zoom (D) Box plot showing the number  
1025 Rin foci per cell. At least 50 cells were counted for each condition from three  
1026 independent experiments. Data are mean  $\pm$  SD.  $P > 0.05$  (ns)  $p < 0.0001$ (\*\*\*\*) by a  
1027 one-way ANOVA (nonparametric) with a Bonferroni's post hoc-test.

1028

### 1029 **Figure 2 CrPV-1A mediated stress granule inhibition requires the BC Box domain**

1030 **and is independent of the Ago-2 binding domain.** (A) Images of transiently  
1031 transfected S2 cells with the indicated *in vitro* transcribed RNAs (16 hours), followed by  
1032 one-hour sodium arsenite treatment (500  $\mu$ M). Shown are representative transfected  
1033 cells detecting GFP fluorescence (green), Rin antibody staining (red) and Hoechst dye  
1034 staining for nucleus (blue) and merged images. The arrows show transfected cells.

1035 Images were taken using the Leica Sp5 confocal microscope with a 63X objective lens  
1036 and 2X zoom (B) Box plot of the number of Rin foci per cell. At least 50 cells were  
1037 counted for each condition from three independent experiments. Data are mean  $\pm$  SD.  
1038  $p > 0.05$  (ns),  $p < 0.021$  (\*),  $p < 0.0001$ (\*\*\*\*) by a one-way ANOVA (nonparametric) with  
1039 a Bonferroni's post hoc-test.

1040

1041 **Figure 3 R146 of CrPV-1A promotes full 2A peptide activity:** (A) Immunoblots of  
1042 lysates from S2 cells transfected with the indicated reporter RNAs (16 hours post  
1043 transfection). A light exposure (top) and longer exposure (bottom) of an anti-GFP  
1044 immunoblot and CrPV-1A immunoblot is shown. (B) Autoradiography of [<sup>35</sup>S] Met/Cys  
1045 labelled proteins from *in vitro* Sf-21 translation reactions incubated with the indicated  
1046 RNAs. (C) Percent quantification of [<sup>35</sup>S] Met/Cys labelled CrPV-1A proteins. Data are  
1047 mean  $\pm$  SD from three independent experiments.  $p > 0.05$  (ns),  $p < 0.002$ (\*\*),  $p <$   
1048  $0.0001$ (\*\*\*\*) by a one-way ANOVA (nonparametric) with a Bonferroni's post hoc-test.  
1049 (D) Immunoblots of lysates from S2 cells infected with (M) mock, CrPV or CrPV R146A  
1050 (MOI 10) at indicated time points.

1051

1052 **Figure 4 CrPV-1A localizes to the nucleus and induces poly(A)+ RNA**  
1053 **accumulation in the nucleus.** (A) Confocal immunofluorescence images of S2 cells  
1054 transfected with *in vitro* transcribed RNA encoding CrPV-1A, CrPV-1A(R146A), or  
1055 CrPV-1A(F114A) for 16 hours. GFP fluorescence (green), CrPV-1A antibody staining  
1056 (red), fluorescence *in situ* hybridization using Cy5-oligo(dT) probes (cyan) and Hoechst  
1057 dye (blue). The arrows show transfected cells. Images were taken using the Leica Sp5

1058 confocal microscope with a 63X objective lens and 2X zoom (B) Box plot of the fraction  
1059 of nuclear to total Cy5-oligo(dT) fluorescence intensity in each cell. At least 50 cells  
1060 were counted for each condition from two independent experiments. Data are mean  $\pm$   
1061 SD.  $p > 0.05$  (ns),  $p < 0.021$  (\*),  $p < 0.002$ (\*\*),  $p < 0.0001$ (\*\*\*\*) by a one-way ANOVA  
1062 (nonparametric) with a Bonferroni's post hoc-test.

1063

1064 **Figure 5 CrPV-1A localizes to the nucleus during virus infection.** Z-stack confocal  
1065 images of S2 cells infected with (A) wild-type CrPV or (B) CrPV(R146A) virus. From left  
1066 to right are Z-stack images through the cells. Cells were fixed and stained with Lamin  
1067 (green), CrPV-1A(red) and Hoechst (blue). Shown are representative images from three  
1068 independent experiments.

1069

1070 **Figure 6 Transcriptional profiling of CrPV and CrPV(R146A) infected S2 cells.** (A)  
1071 Principal component analysis of transcriptional signatures from cells infected with Mock,  
1072 CrPV or CrPV(R146A). (B) Bar graph indicating the number of differentially expressed  
1073 genes for each comparison identified by DESeq2 (C) Volcano plots showing changes in  
1074 gene expression with fold change (FC) in expression intensity of DEGs, plotted against  
1075 corresponding FDR for 2 hrs and (D) 4 hrs. (E) Network analysis diagram showing  
1076 Gene ontology analysis filtered by molecular function for CrPV infected cells (F) Venn  
1077 diagram showing comparison of dicistrovirus transcriptome datasets (99).

1078

1079 **Figure 7 RNA export modulates CrPV infection.** (A) Fluorescence *in situ*  
1080 hybridization using Cy5-oligo(dT) (blue) of S2 cells incubated with dsRNA targeting  
1081 RNA export factor NXF1 or control GFP and Hoechst dye (blue), followed by mock  
1082 infection or infection with wild-type or R146A mutant virus for 8 hours (MOI 10). (B)  
1083 Viral yield from wild-type and mutant (R146A) CrPV infected S2 cells was accessed by  
1084 fluorescence foci unit (FFU). Shown are averages from two independent experiments.

1085  
1086 **Figure 8 Nup358 promotes CrPV infection in an R146-dependent manner.** (A)  
1087 Immunoblots of S2 cells treated with dsRNA targeting GP210, mTor, Rae1, Nup88,  
1088 Nup214, Nup358 or control FLuc, followed by mock infection or infection with wild-type  
1089 or mutant CrPV virus for 8 hours (MOI 1). (B) Quantification of VP2 intensity normalized  
1090 to tubulin. The intensity values are normalized to the VP2/Tubulin intensity in FLuc  
1091 control knockdown cells. (C) CrPV viral RNA levels by qRT-PCR analysis normalized to  
1092 Rps9 mRNA levels. Data are mean  $\pm$  SD relative to WT  $p > 0.05$  (ns),  $p < 0.002$ (\*\*),  $p <$   
1093  $0.0001$ (\*\*\*\*) by a one-way ANOVA (nonparametric) with a Bonferroni's post hoc test. (D)  
1094 Fluorescence in situ hybridization using Cy5-oligo(dT) or antibody staining of Rin (red)  
1095 of S2 cells treated with control dsRNA or Nup358 dsRNA in the presence of DMSO or  
1096 Pateamine A (Pat A). Hoechst staining is shown in blue. The arrows show Nup358  
1097 knockdown cells Shown are representative images of at least two independent  
1098 experiments.

1099

1100 **Figure 9 Nup358 is degraded during CrPV infection.** (A) Immunoblot of S2 cell  
1101 lysates treated with dsRNA targeting FLuc or Nup358. (B) Immunoblots of S2 cell  
1102 lysates infected with (M) mock, CrPV or CrPV(R146A) (MOI 1) in the presence or  
1103 absence of DMSO or 50  $\mu$ M MG132. Shown are representative immunoblots from three  
1104 independent experiments.

1105  
1106 **Figure 10 Model of stress granule inhibition by CrPV-1A.** During CrPV infection,  
1107 CrPV-1A localizes to the nuclear membrane in an R146-dependent manner and recruits  
1108 Cul2-Rbx1-EloBC complex to ubiquitinate Nup358 leading to its degradation. The  
1109 degradation of Nup358 results in a block in mRNA export, resulting in the enrichment of  
1110 poly (A)+ mRNAs in the nucleus, and together inhibits stress granule formation which,  
1111 facilitates virus infection.

1112

## 1113 **SUPPORTING INFORMATION**

1114

1115 **Figure S1. CrPV-1A localizes to the nucleus at times post-infection.** (A)  
1116 Fluorescent images of S2 cells infected with CrPV (MOI 10) at indicated time points  
1117 stained with CrPV-1A antibody (red) or Hoechst dye (blue).

1118 **Figure S2. CrPV infection induces changes in gene expression** (A) Hierarchical  
1119 clustering of top 1000 genes (ranked by standard deviation across all the samples)  
1120 showing difference in gene expression induced during virus infection. (B) Bar diagram

1121 showing comparisons on number of differentially expressed genes (C) Network analysis  
1122 on upregulated genes

1123 **Figure S3. Depletion of Nup358 impairs SG formation.** Antibody staining of Rin (red)  
1124 or Lamin (green) of S2 cells treated with control dsRNA or Nup358 dsRNA in the  
1125 presence or absence of arsenite. Hoechst staining is shown in blue. (B) Box plot of the  
1126 number of Rin foci per cell. At least 30 cells were counted for each condition from two  
1127 independent experiments. Data are mean  $\pm$  SD.  $p < 0.021$ (\*) by a one-way ANOVA  
1128 (nonparametric) with a Bonferroni's post hoc-test.

1129

### 1130 **ACKNOWLEDGEMENTS**

1131 We thank Eric Lecuyer for generously providing the Rin antibody. We acknowledge the  
1132 UBC Life Science Institute core imaging facility for use of the Leica Sp5 microscope and  
1133 Cellomics microscope. We thank Génome Québec for the support with RNA  
1134 sequencing, Irvin Wason for helping with the gel filtration chromatography, and the Jan  
1135 lab (Jodi Chien, Rachel DaSilva, Reid Warsaba and Christina Young) for discussions  
1136 and critical reading of the paper. This study was supported by a CIHR operating grant  
1137 (PJT-178342) and an NSERC grant (RGPIN-2017-04515) to EJ, an NIH grant (A132131  
1138 - R01AI137471) to RA, and a SERB-UBC Doctoral scholarship to JS.

1139

1140

1141 **AUTHORS CONTRIBUTIONS**

1142 Conceptualization: Jibin Sadasivan, Eric Jan

1143 Data curation: Jibin Sadasivan, Marli Vlok, Xinying Wang

1144 Formal analysis: Jibin Sadasivan, Marli Vlok, Eric Jan

1145 Investigation: Jibin Sadasivan, Xinying Wang, Arabinda Nayak, Raul Andino, Eric Jan

1146 Methodology: Jibin Sadasivan, Marli Vlok, Eric Jan

1147 Project administration: Jibin Sadasivan, Eric Jan

1148 Supervision: Eric Jan, Raul Andino

1149 Visualization: Jibin Sadasivan, Eric Jan

1150 Validation: Jibin Sadasivan, Xinying Wang

1151 Writing – original draft: Jibin Sadasivan, Eric Jan

1152 Writing – review & editing: Jibin Sadasivan, Marli Vlok, Xinying Wang, Arabinda Nayak,

1153 Raul Andino, Eric Jan

1154

1155



bioRxiv preprint doi: <https://doi.org/10.1101/2022.05.19.492599>; this version posted May 19, 2022. The copyright holder for this preprint (which was not certified by peer review) is the author/funder, who has granted bioRxiv a license to display the preprint in perpetuity. It is made available under aCC-BY 4.0 International license.

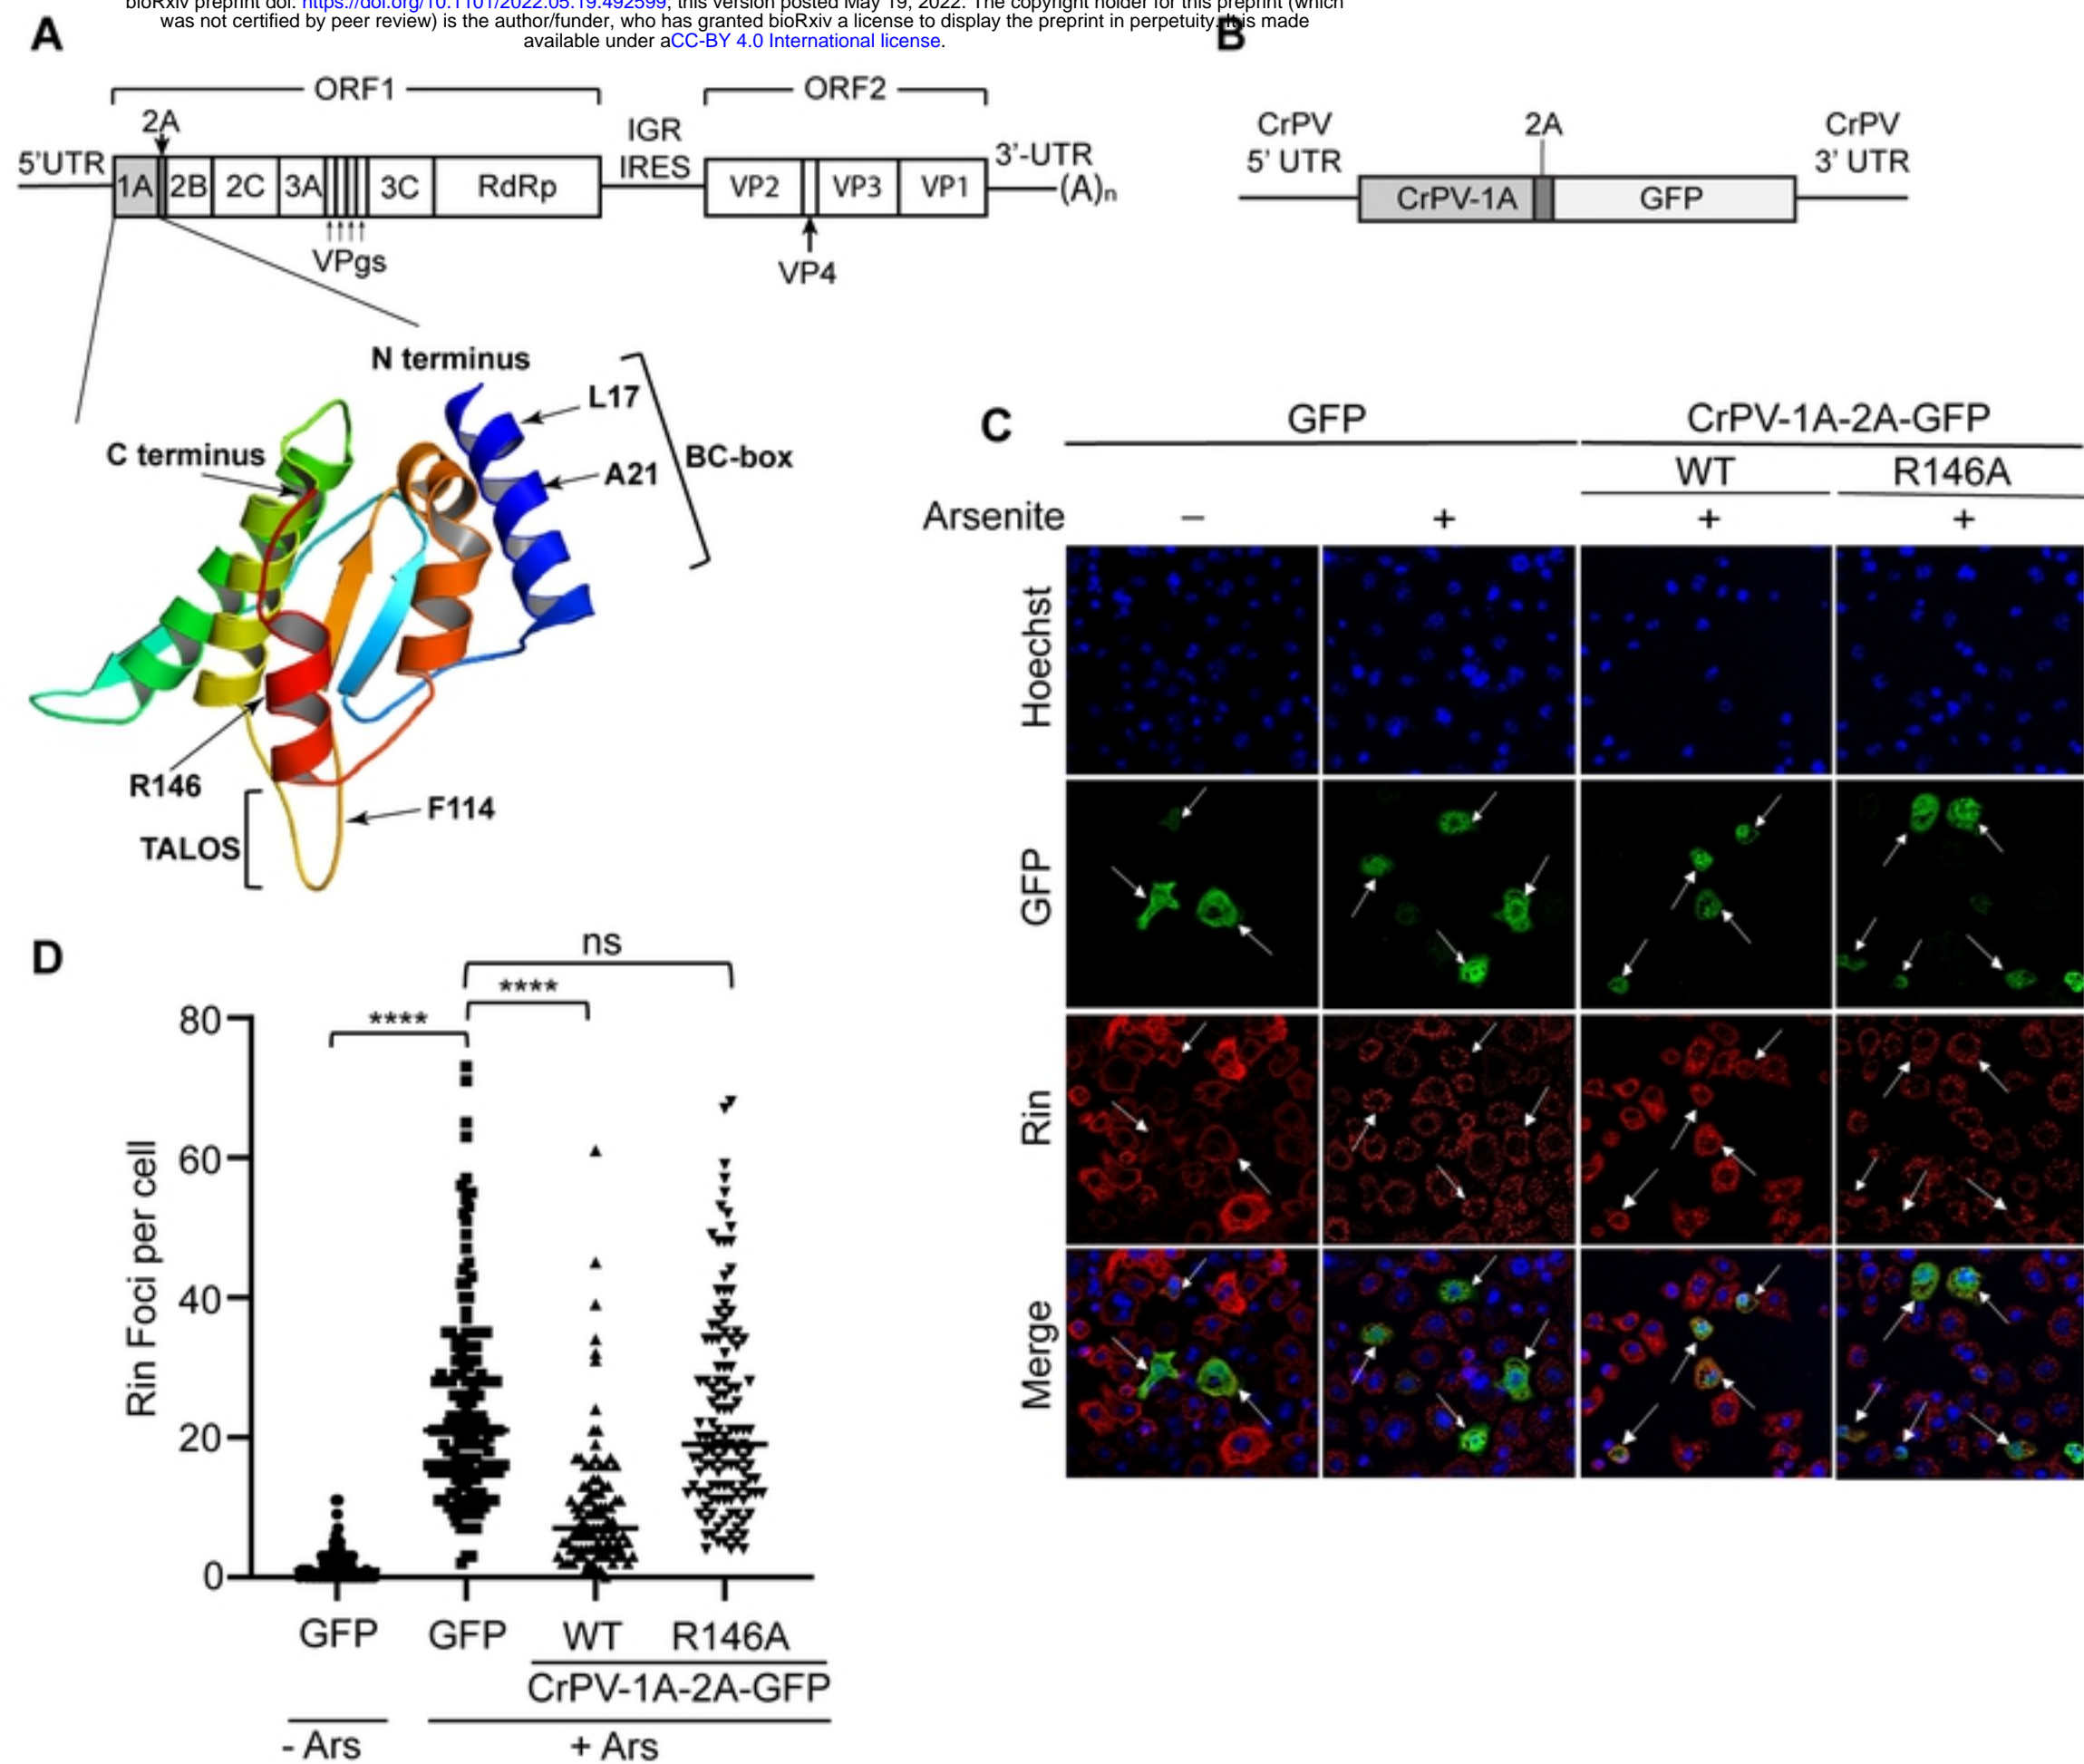

Figure 1

**A**

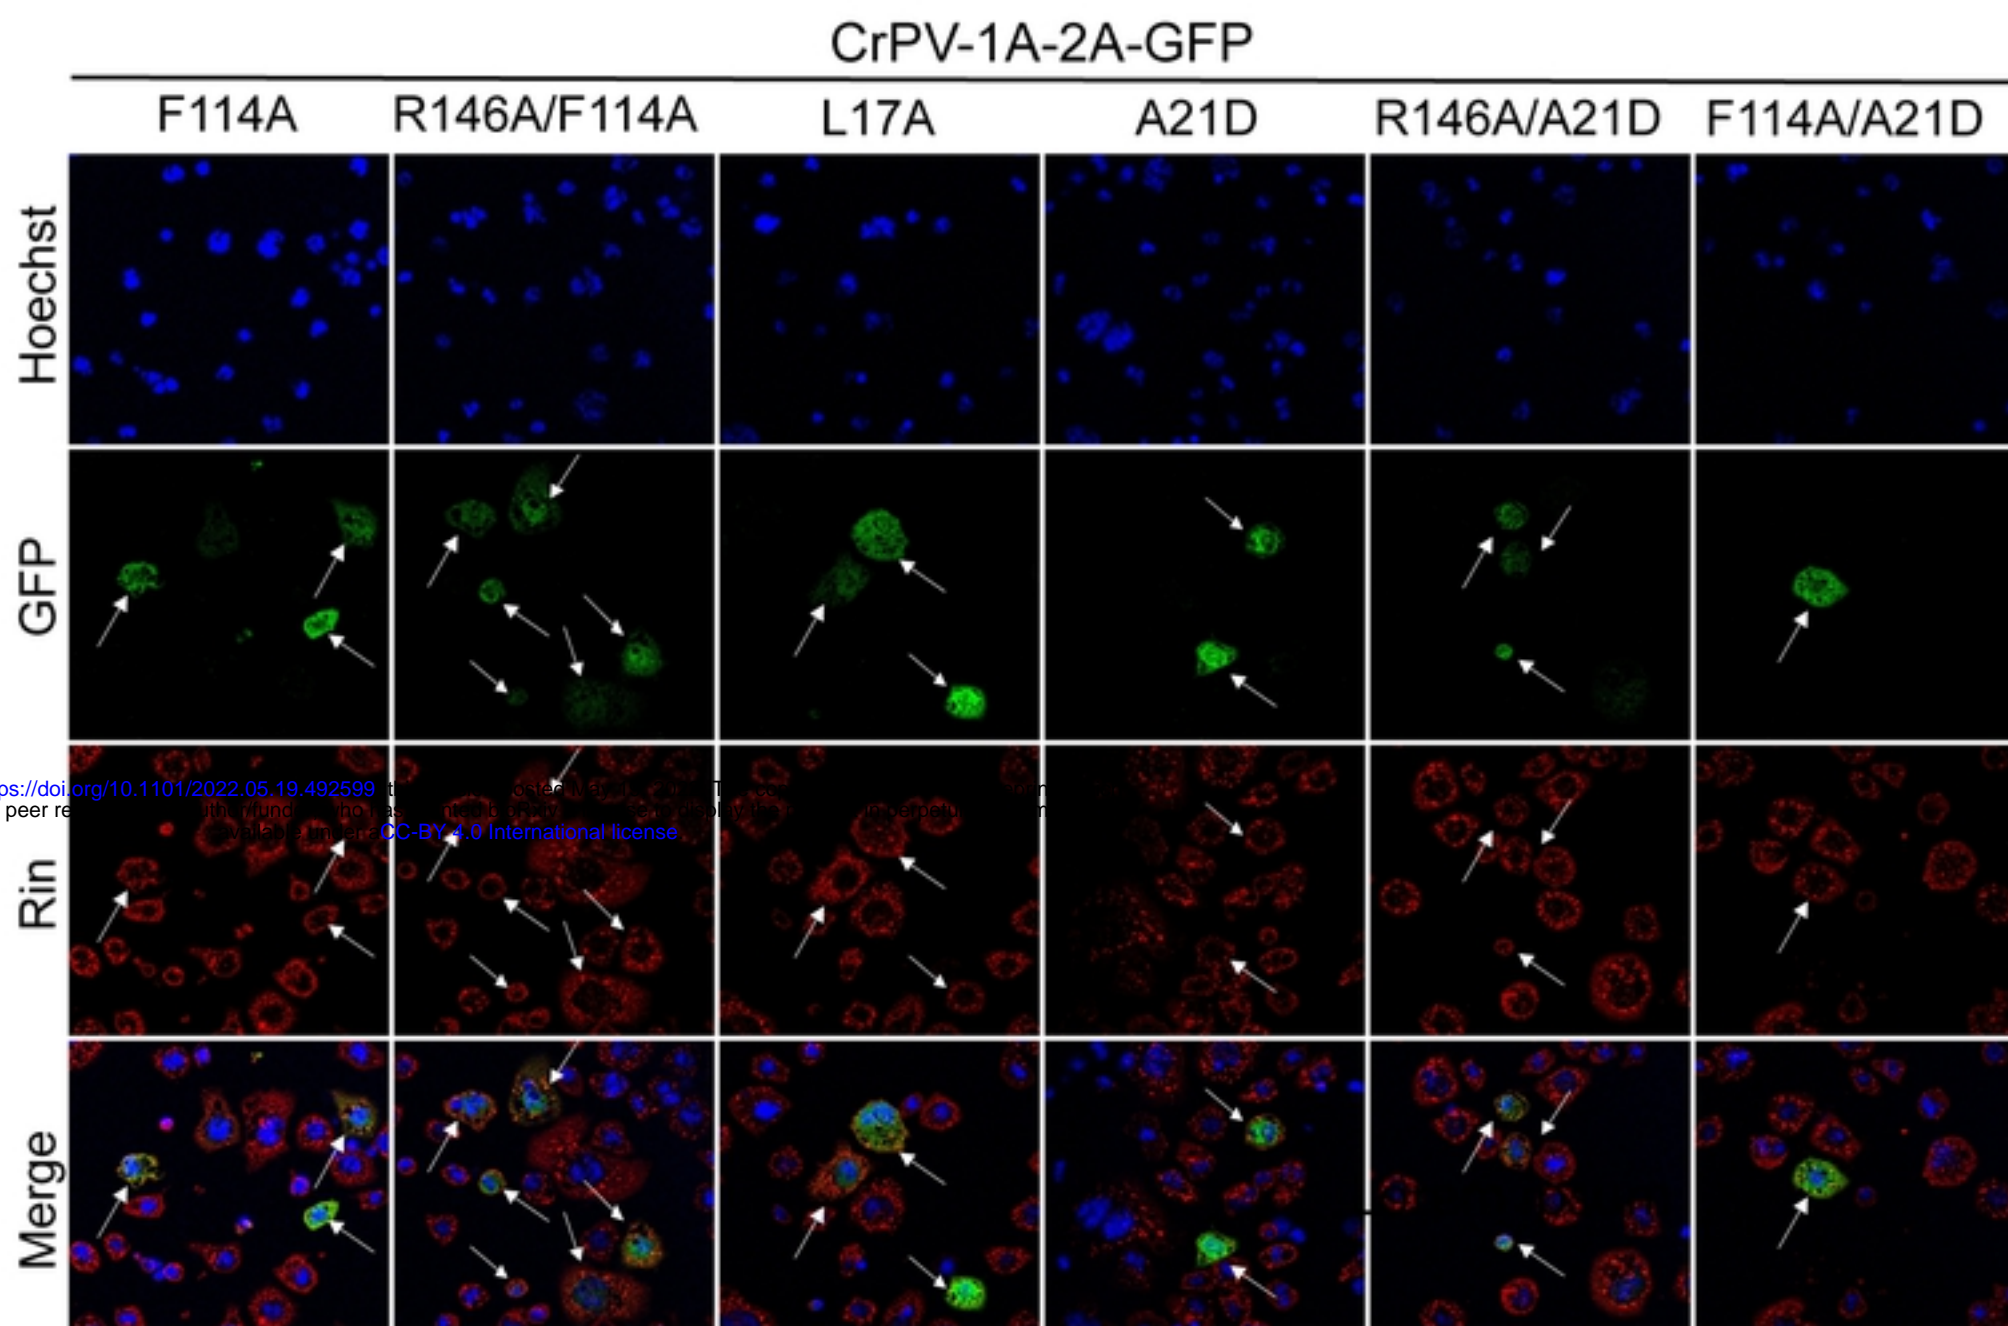

**B**

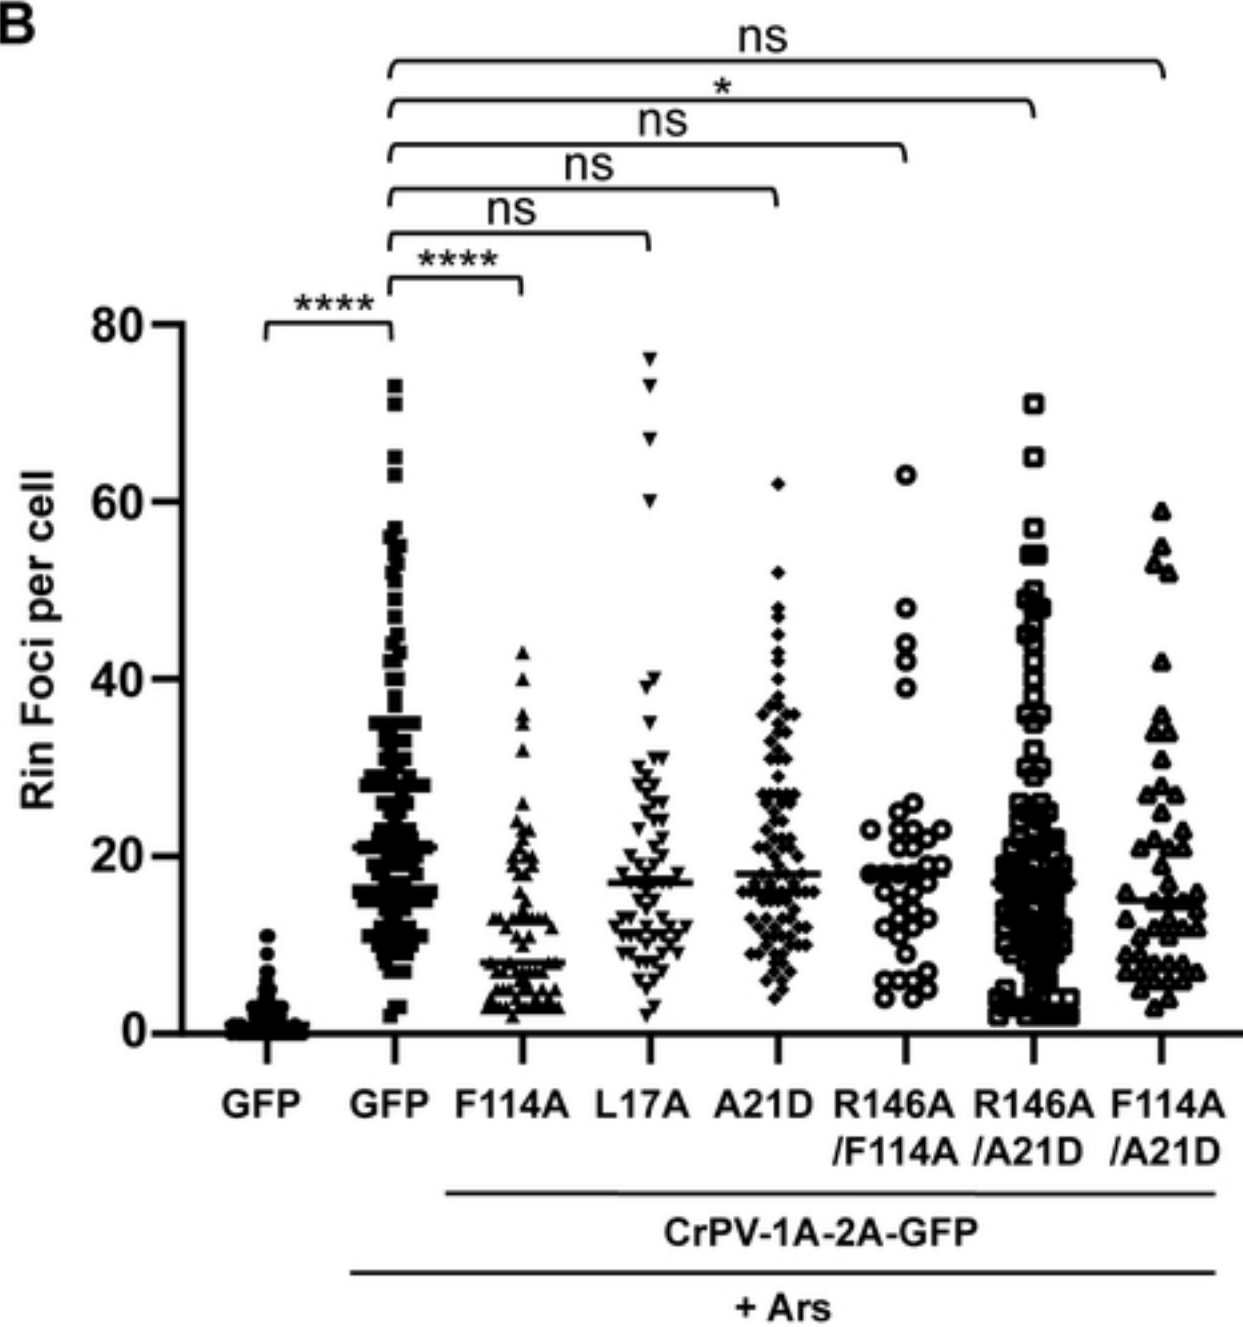

Figure 2

bioRxiv preprint doi: <https://doi.org/10.1101/2022.05.19.492599>; this version posted May 19, 2022. The copyright holder for this preprint (which was not certified by peer review) is the author/funder, who has granted bioRxiv a license to display the preprint in perpetuity. It is made available under aCC-BY 4.0 International license.

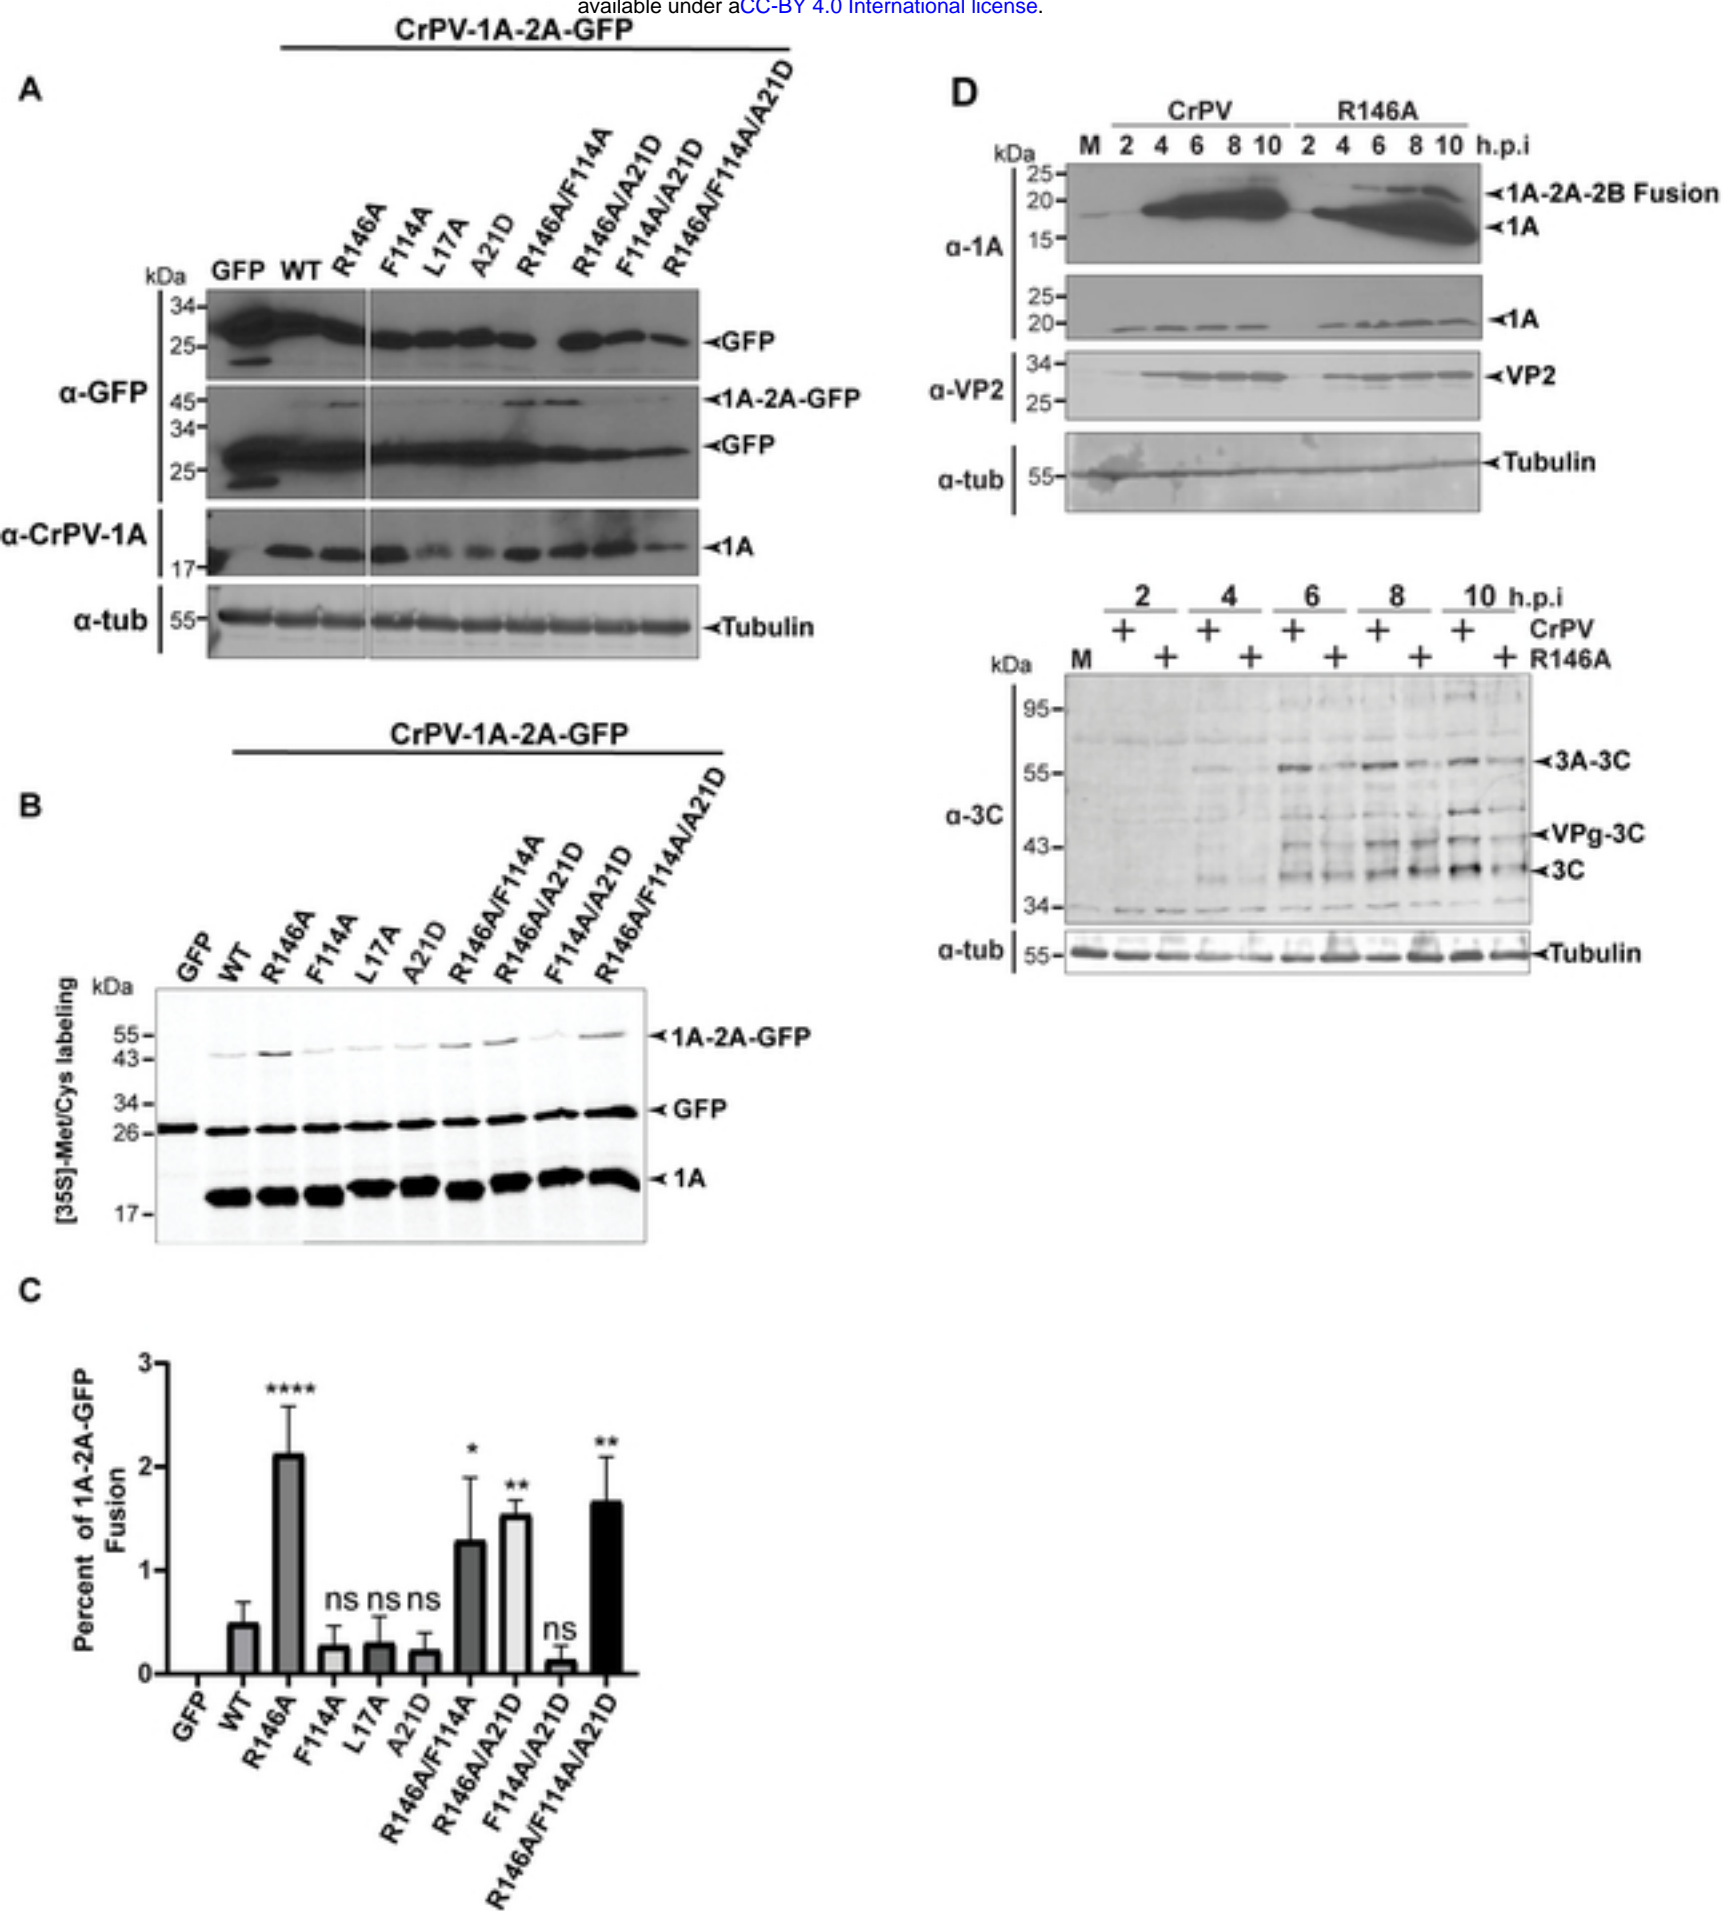

Figure 3

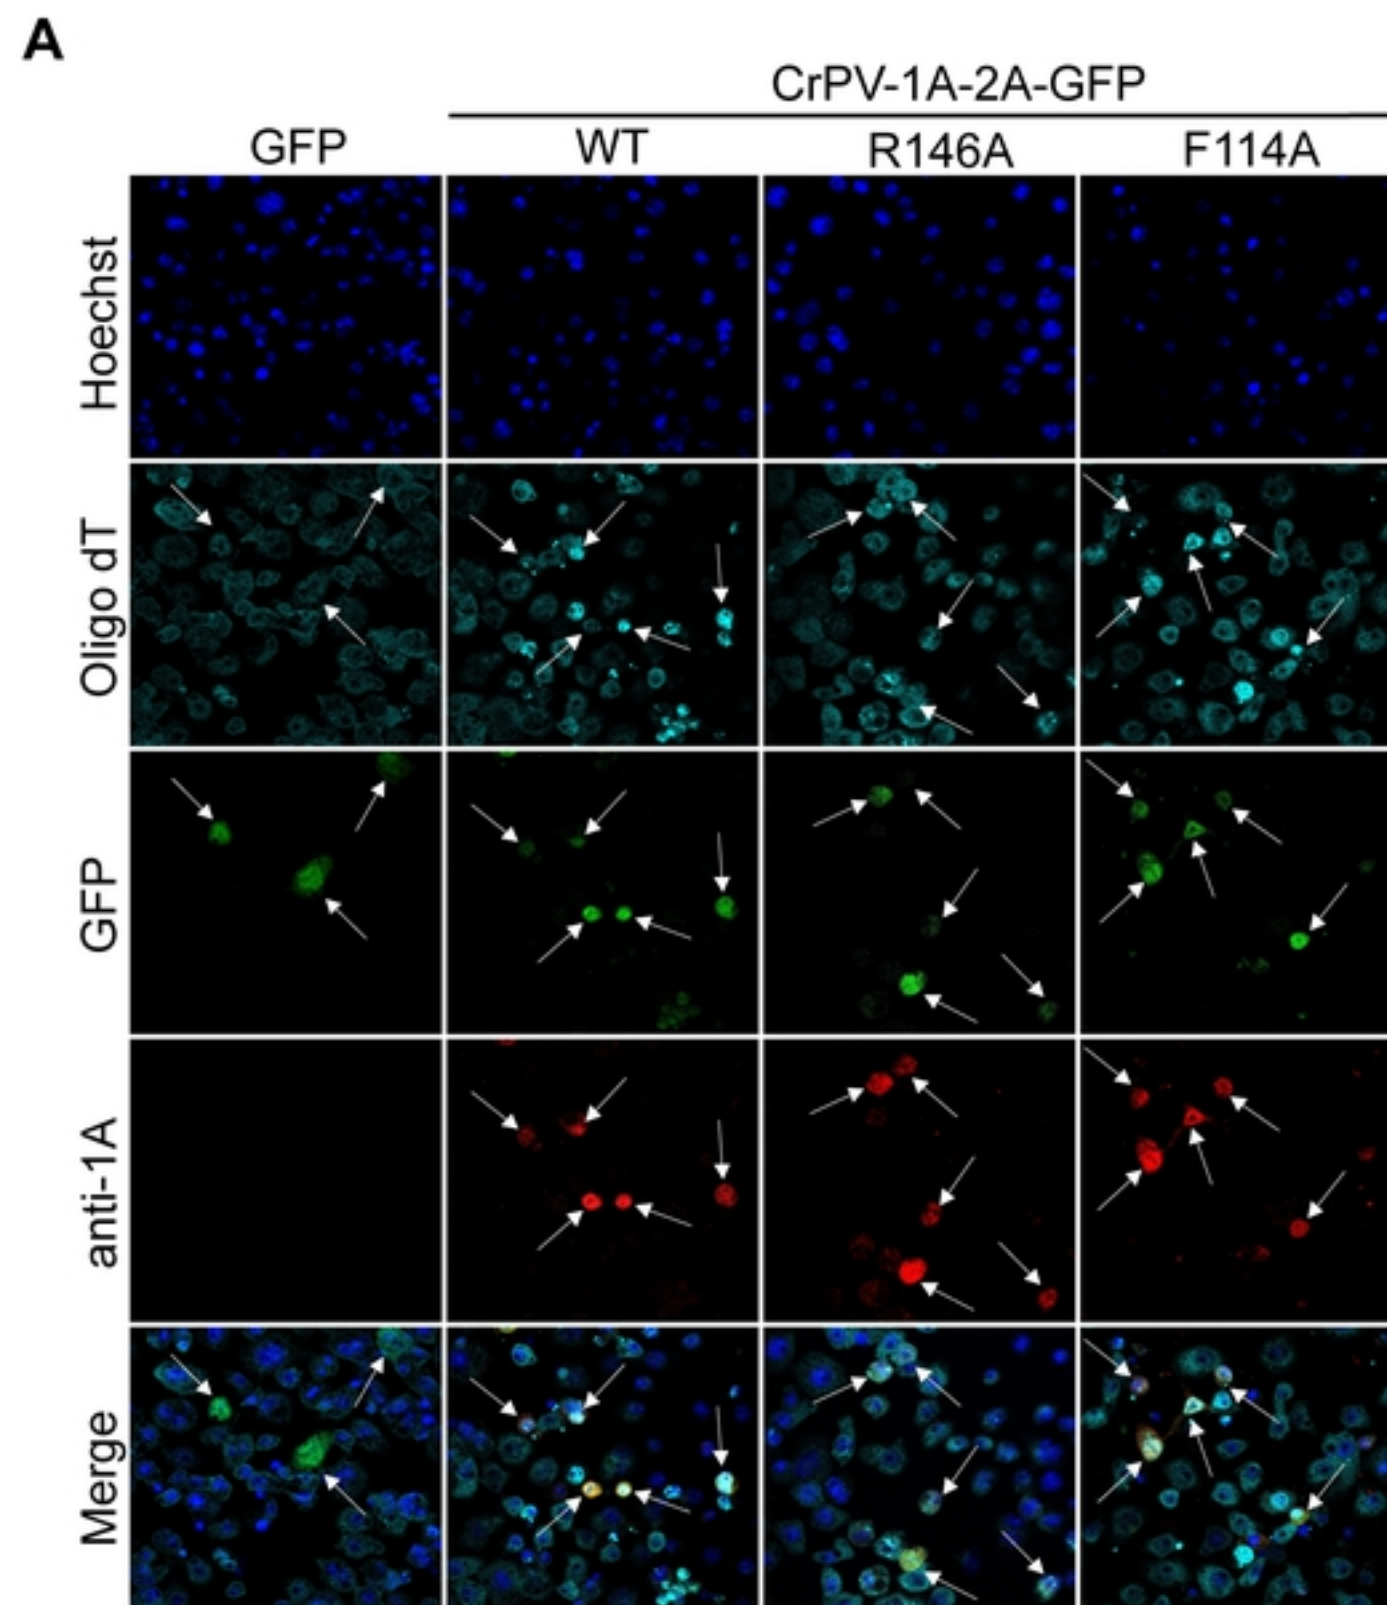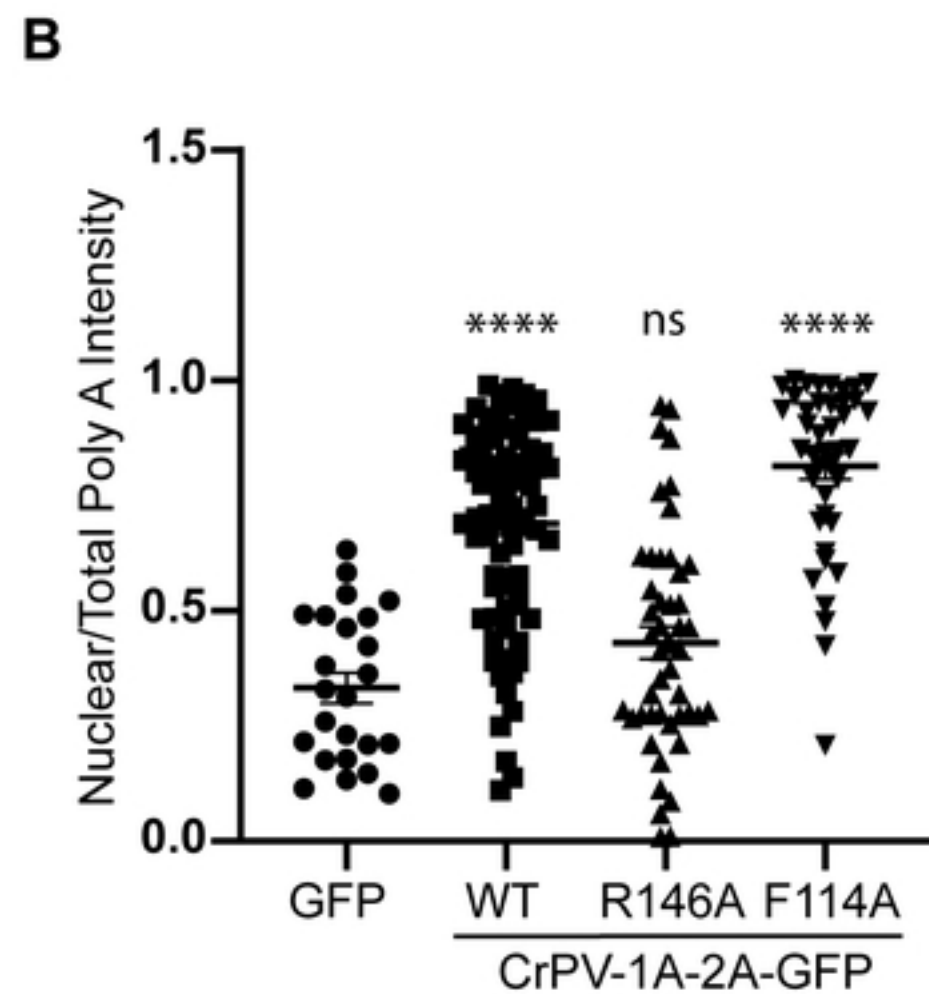

Figure 4

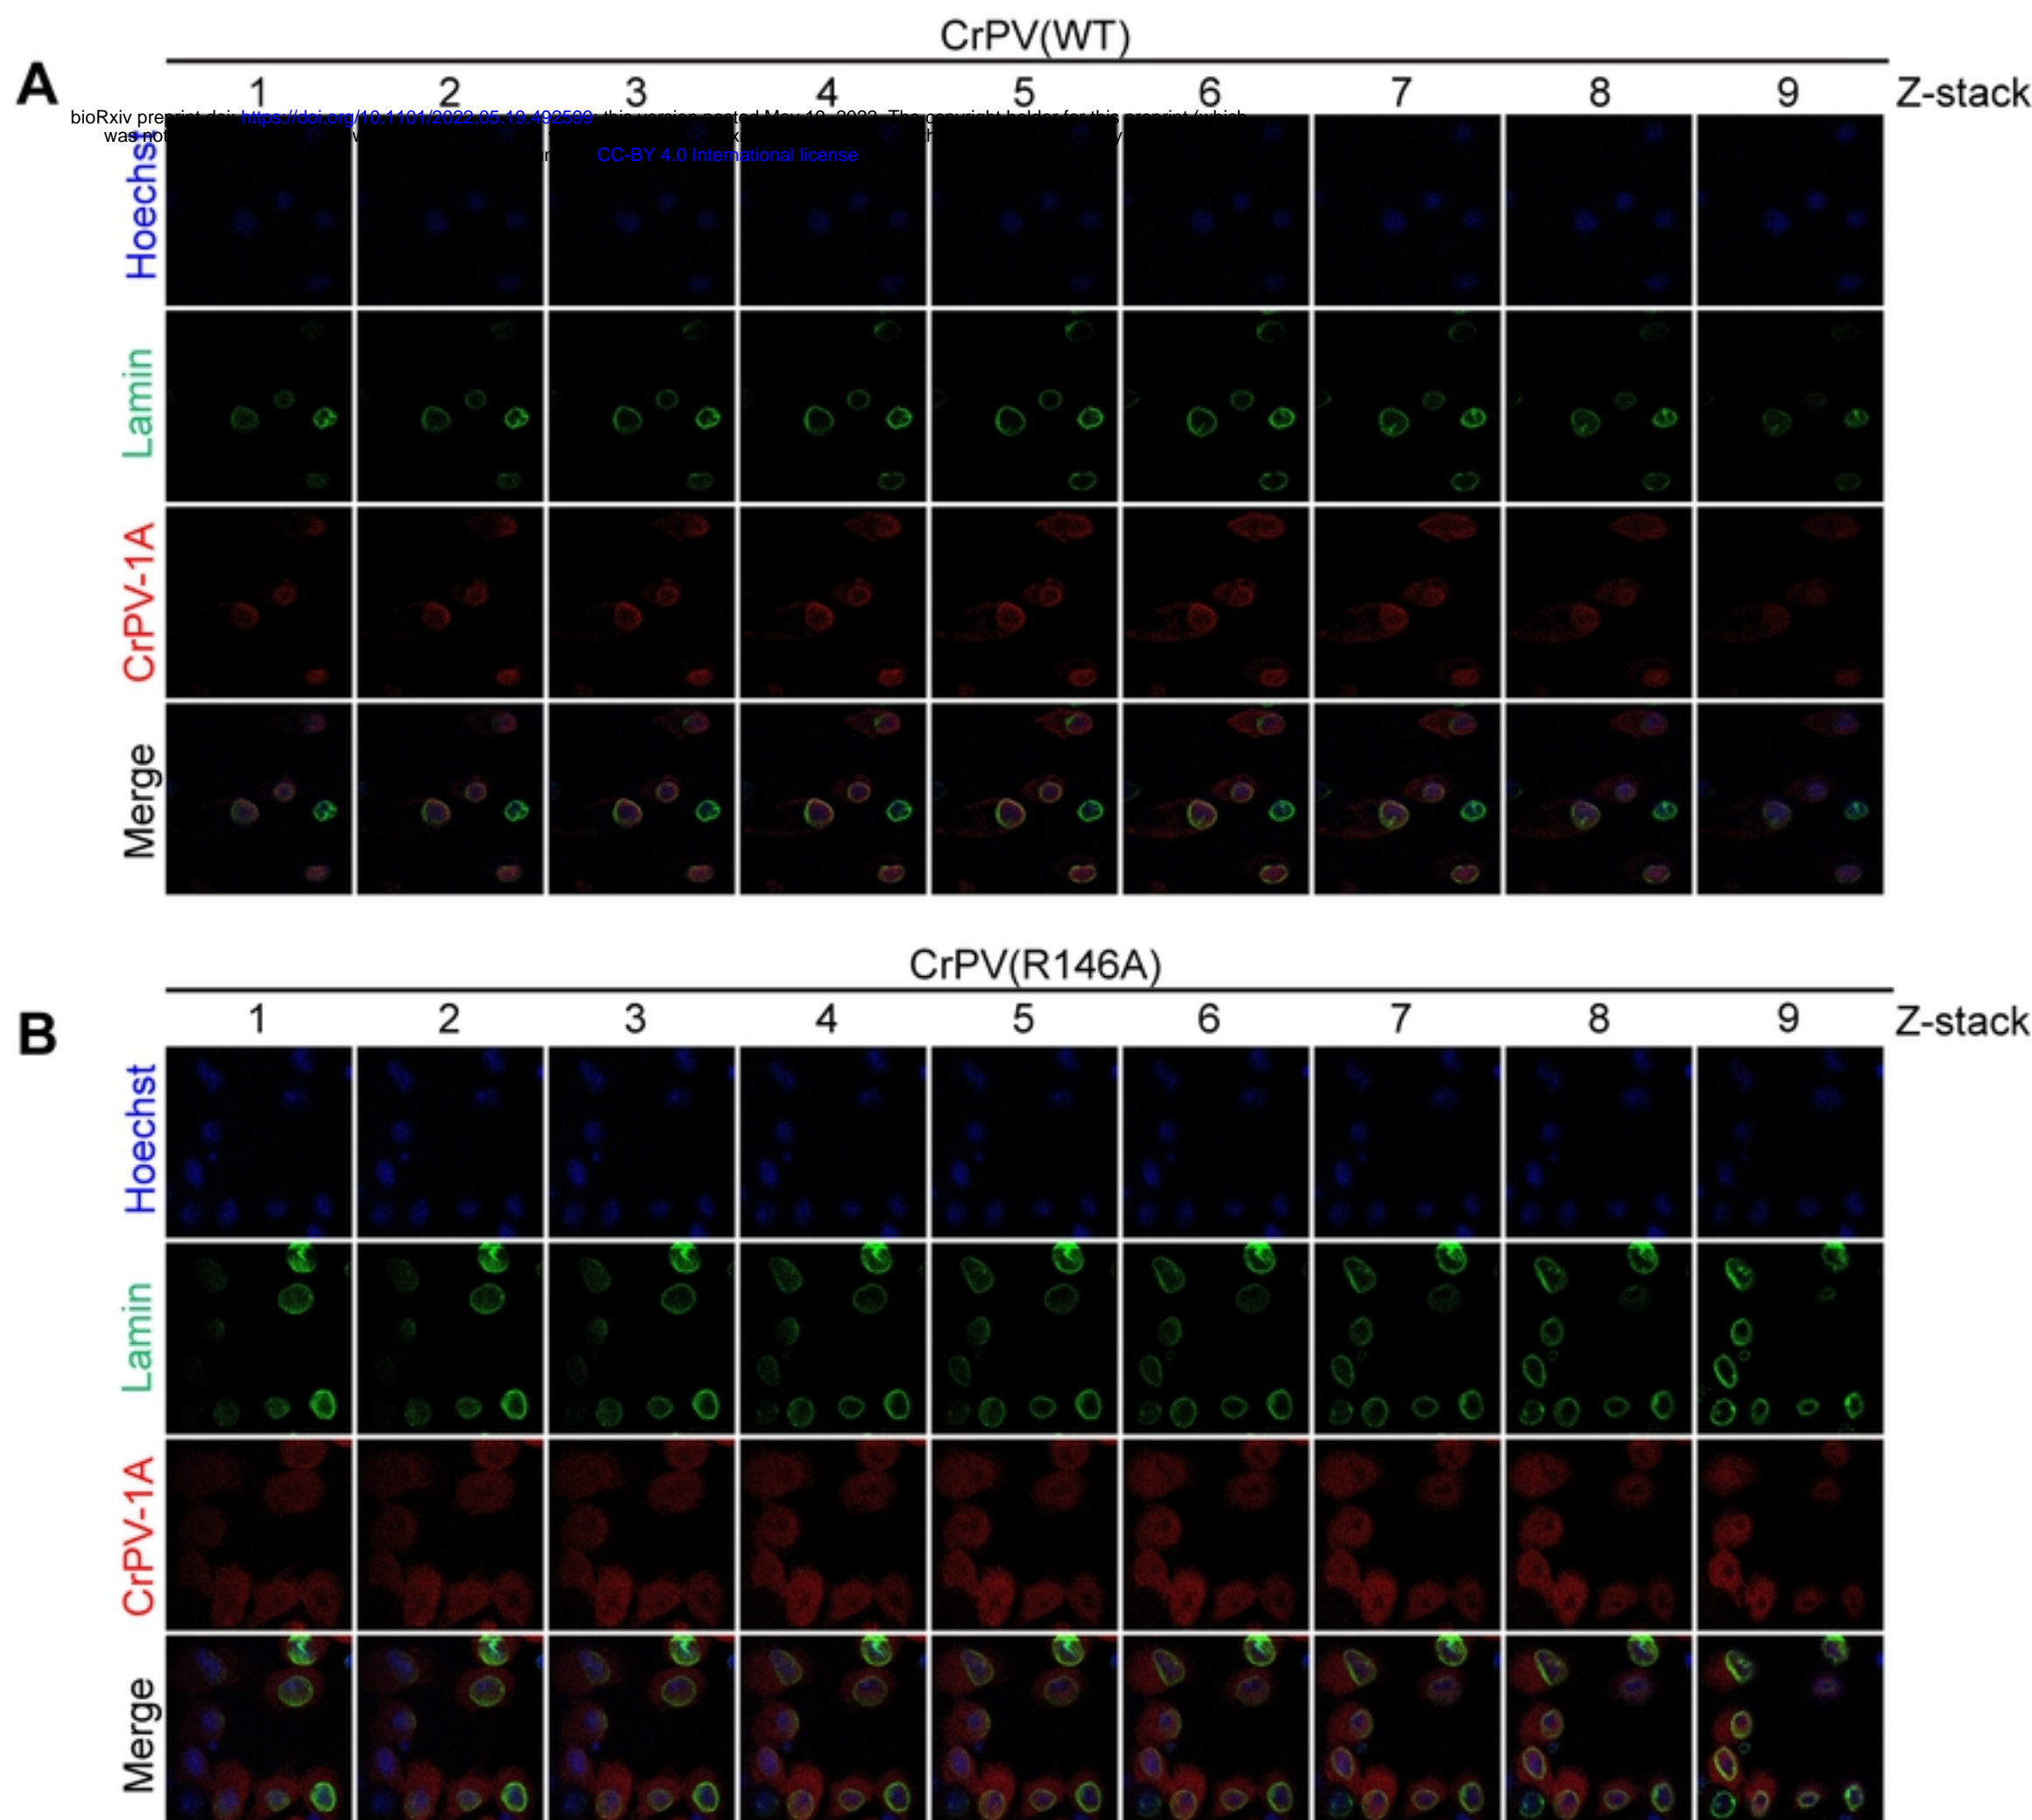

Figure 5

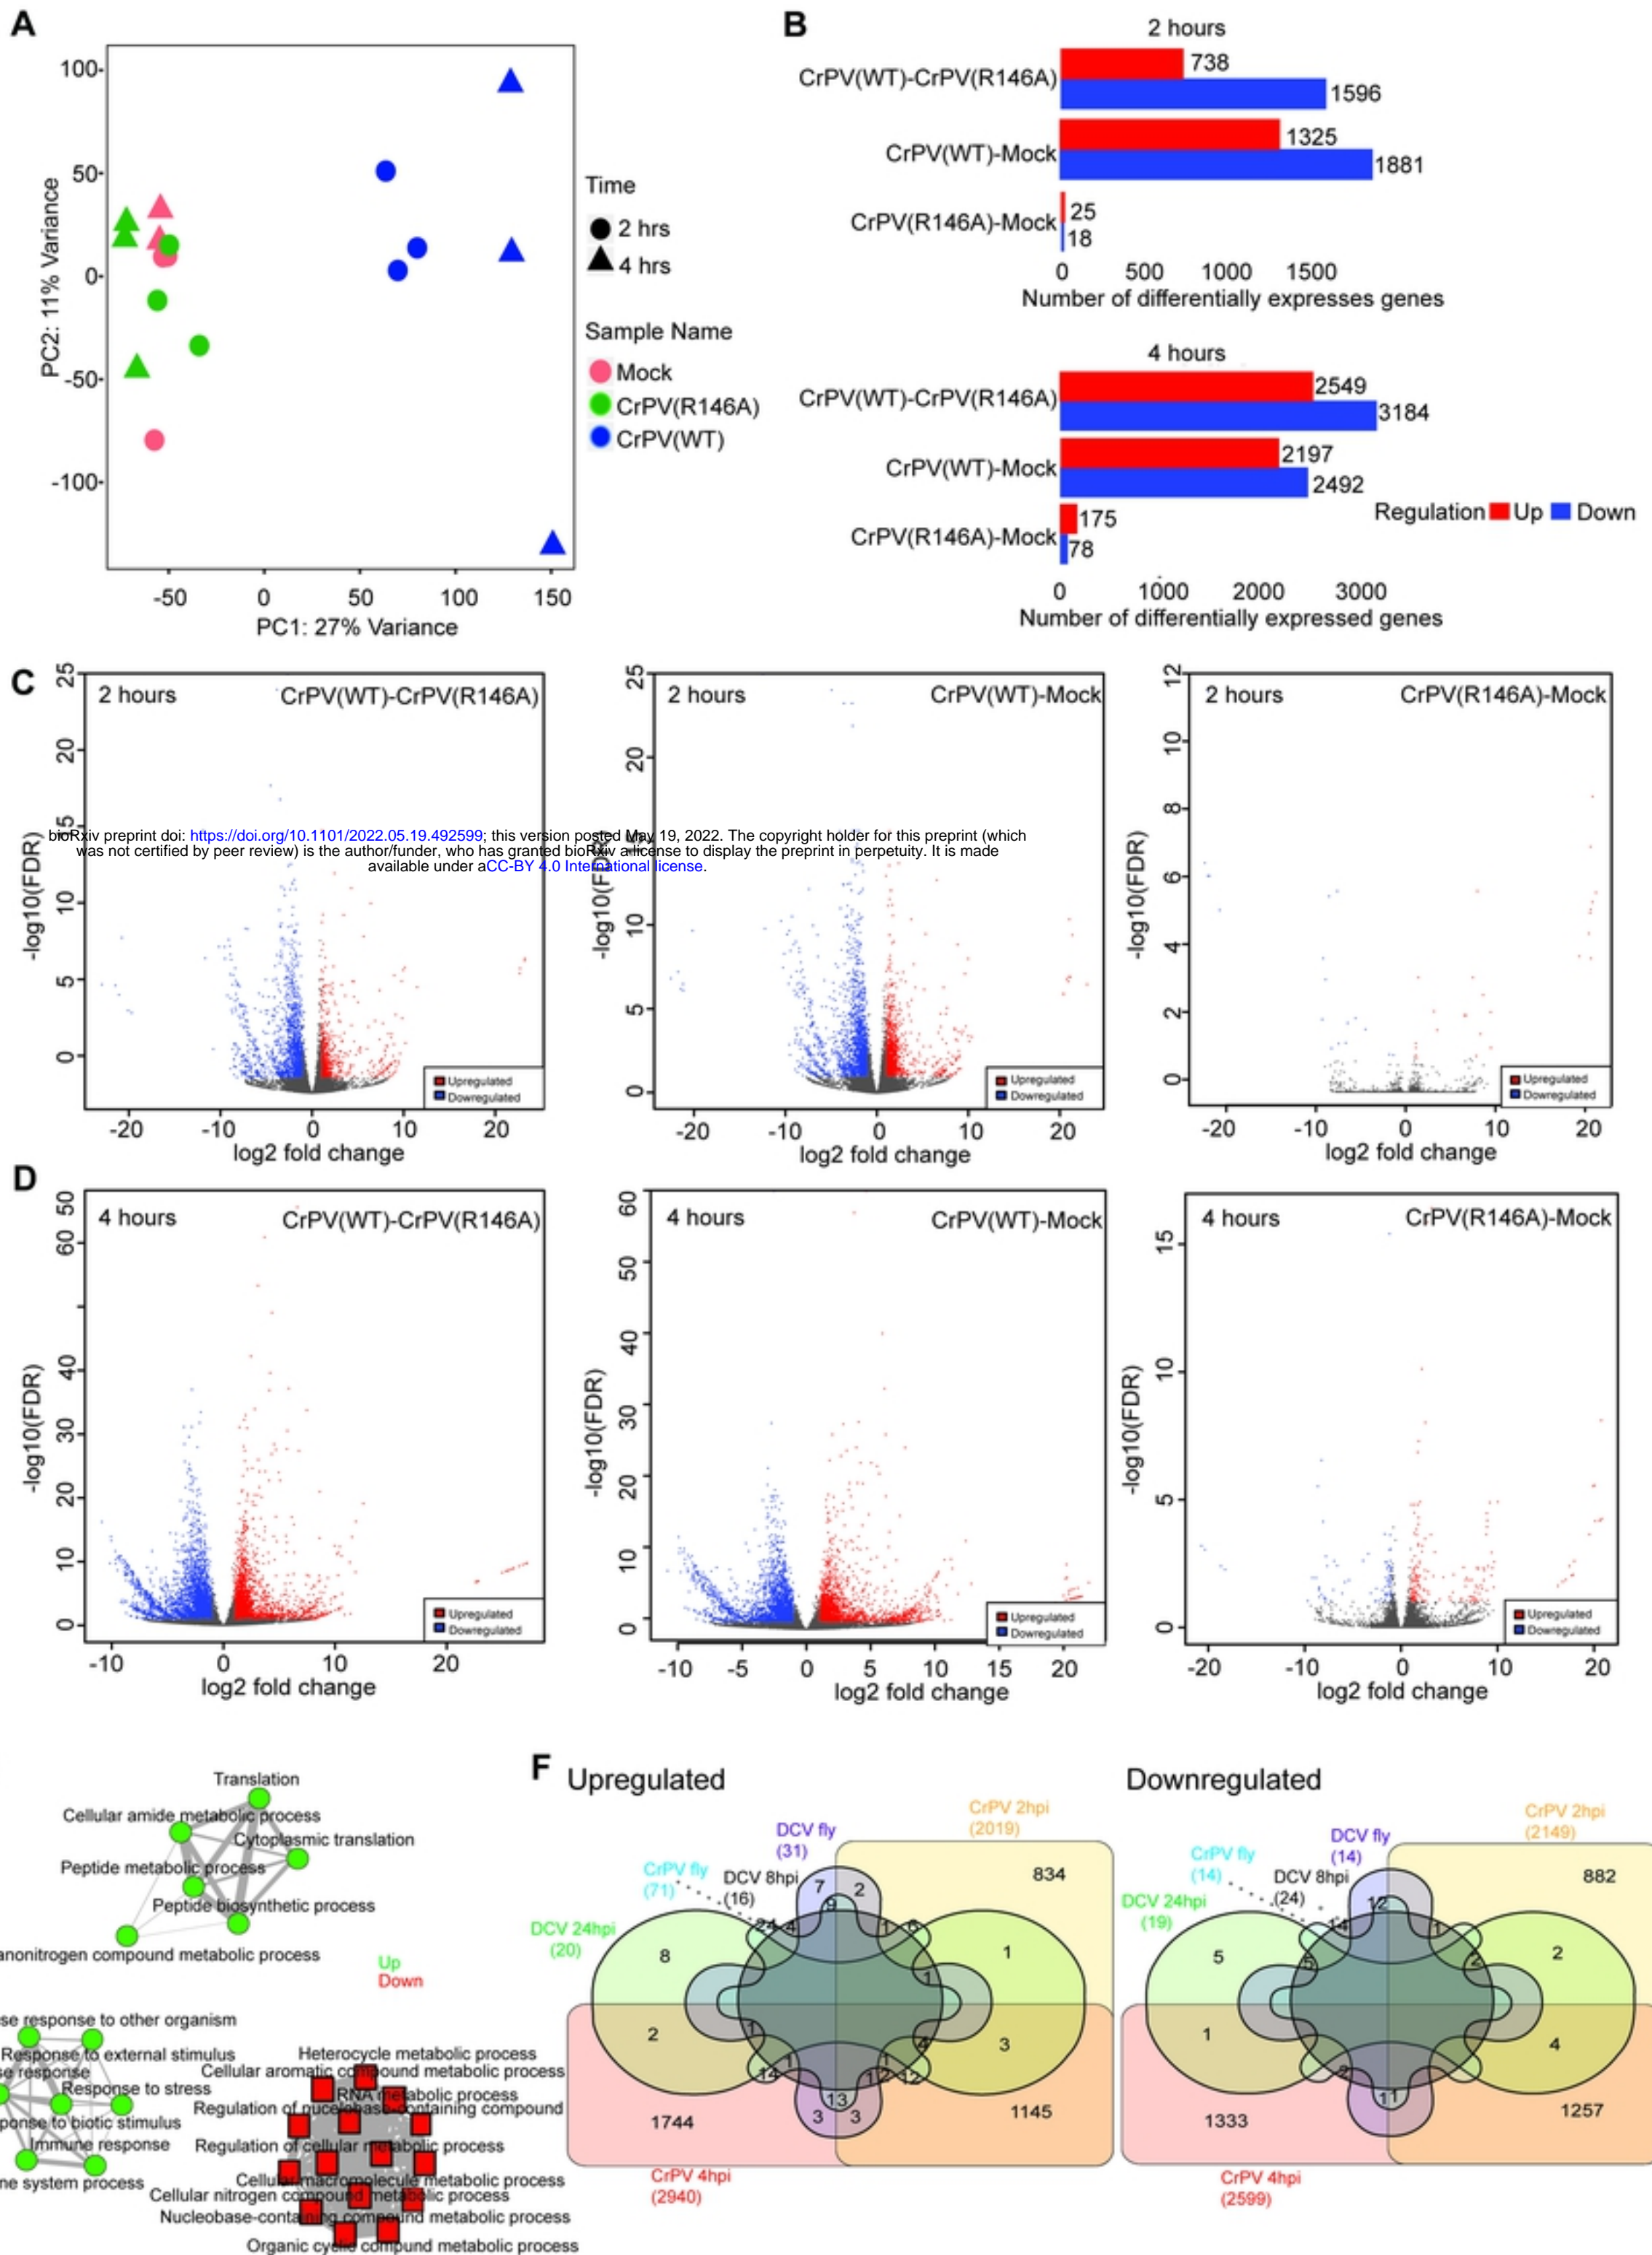

Figure 6

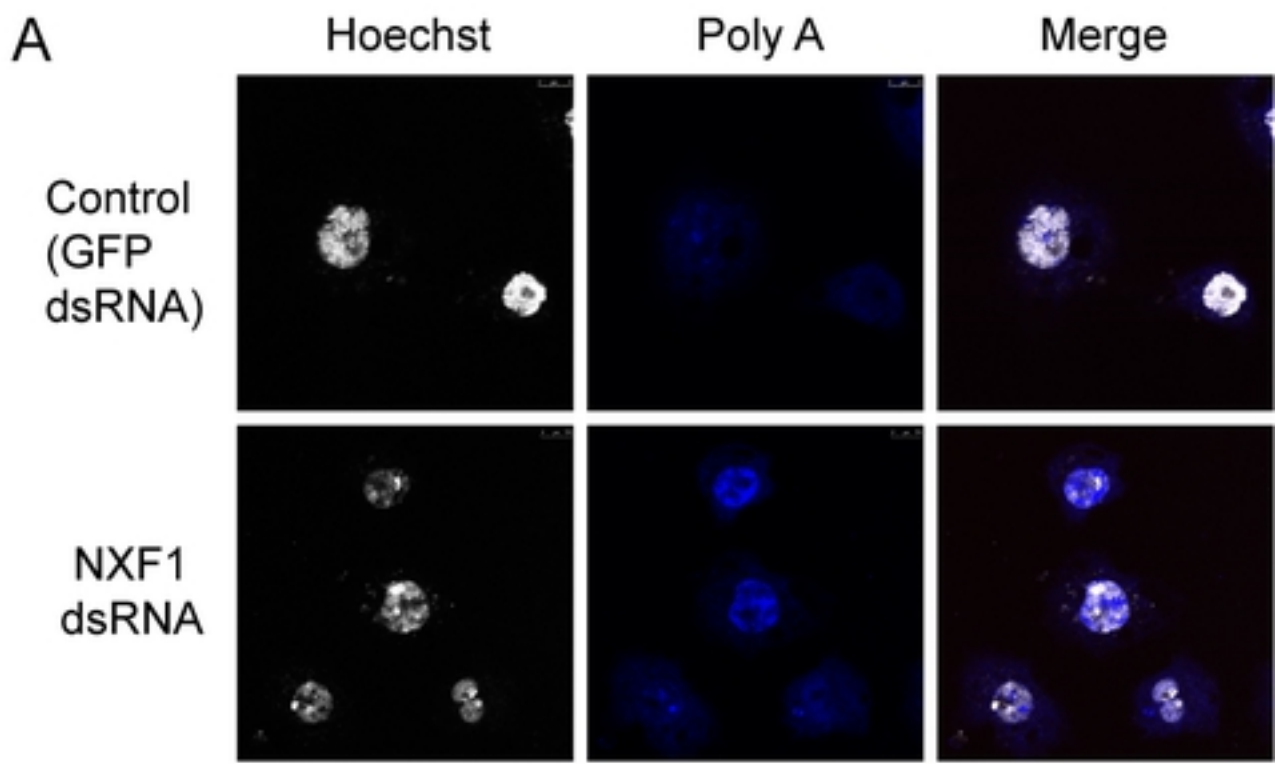

**B**

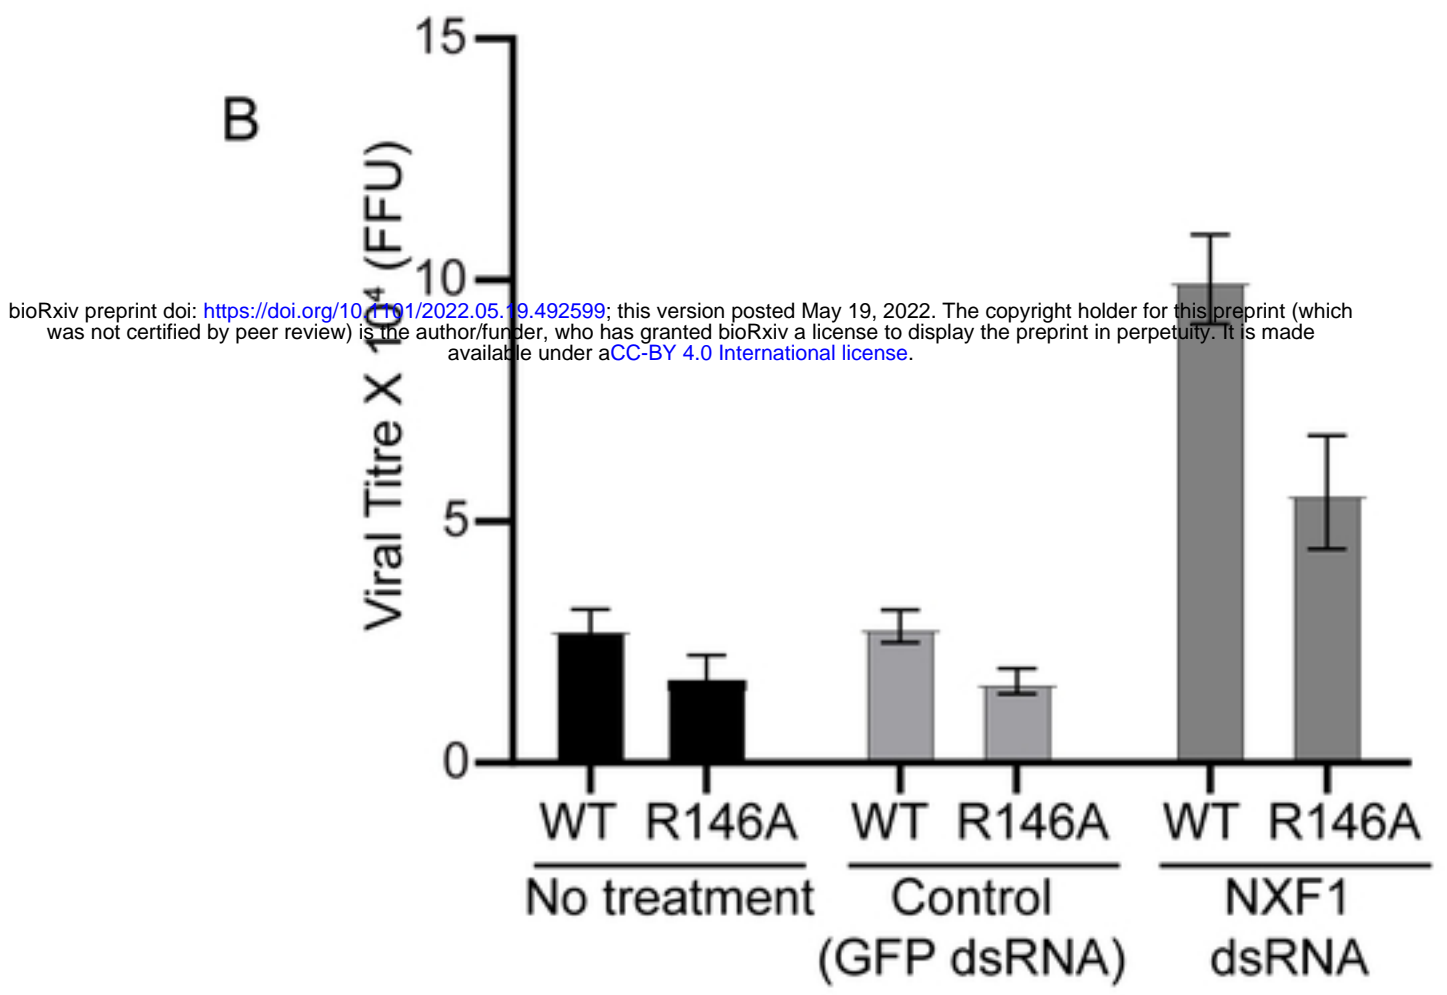

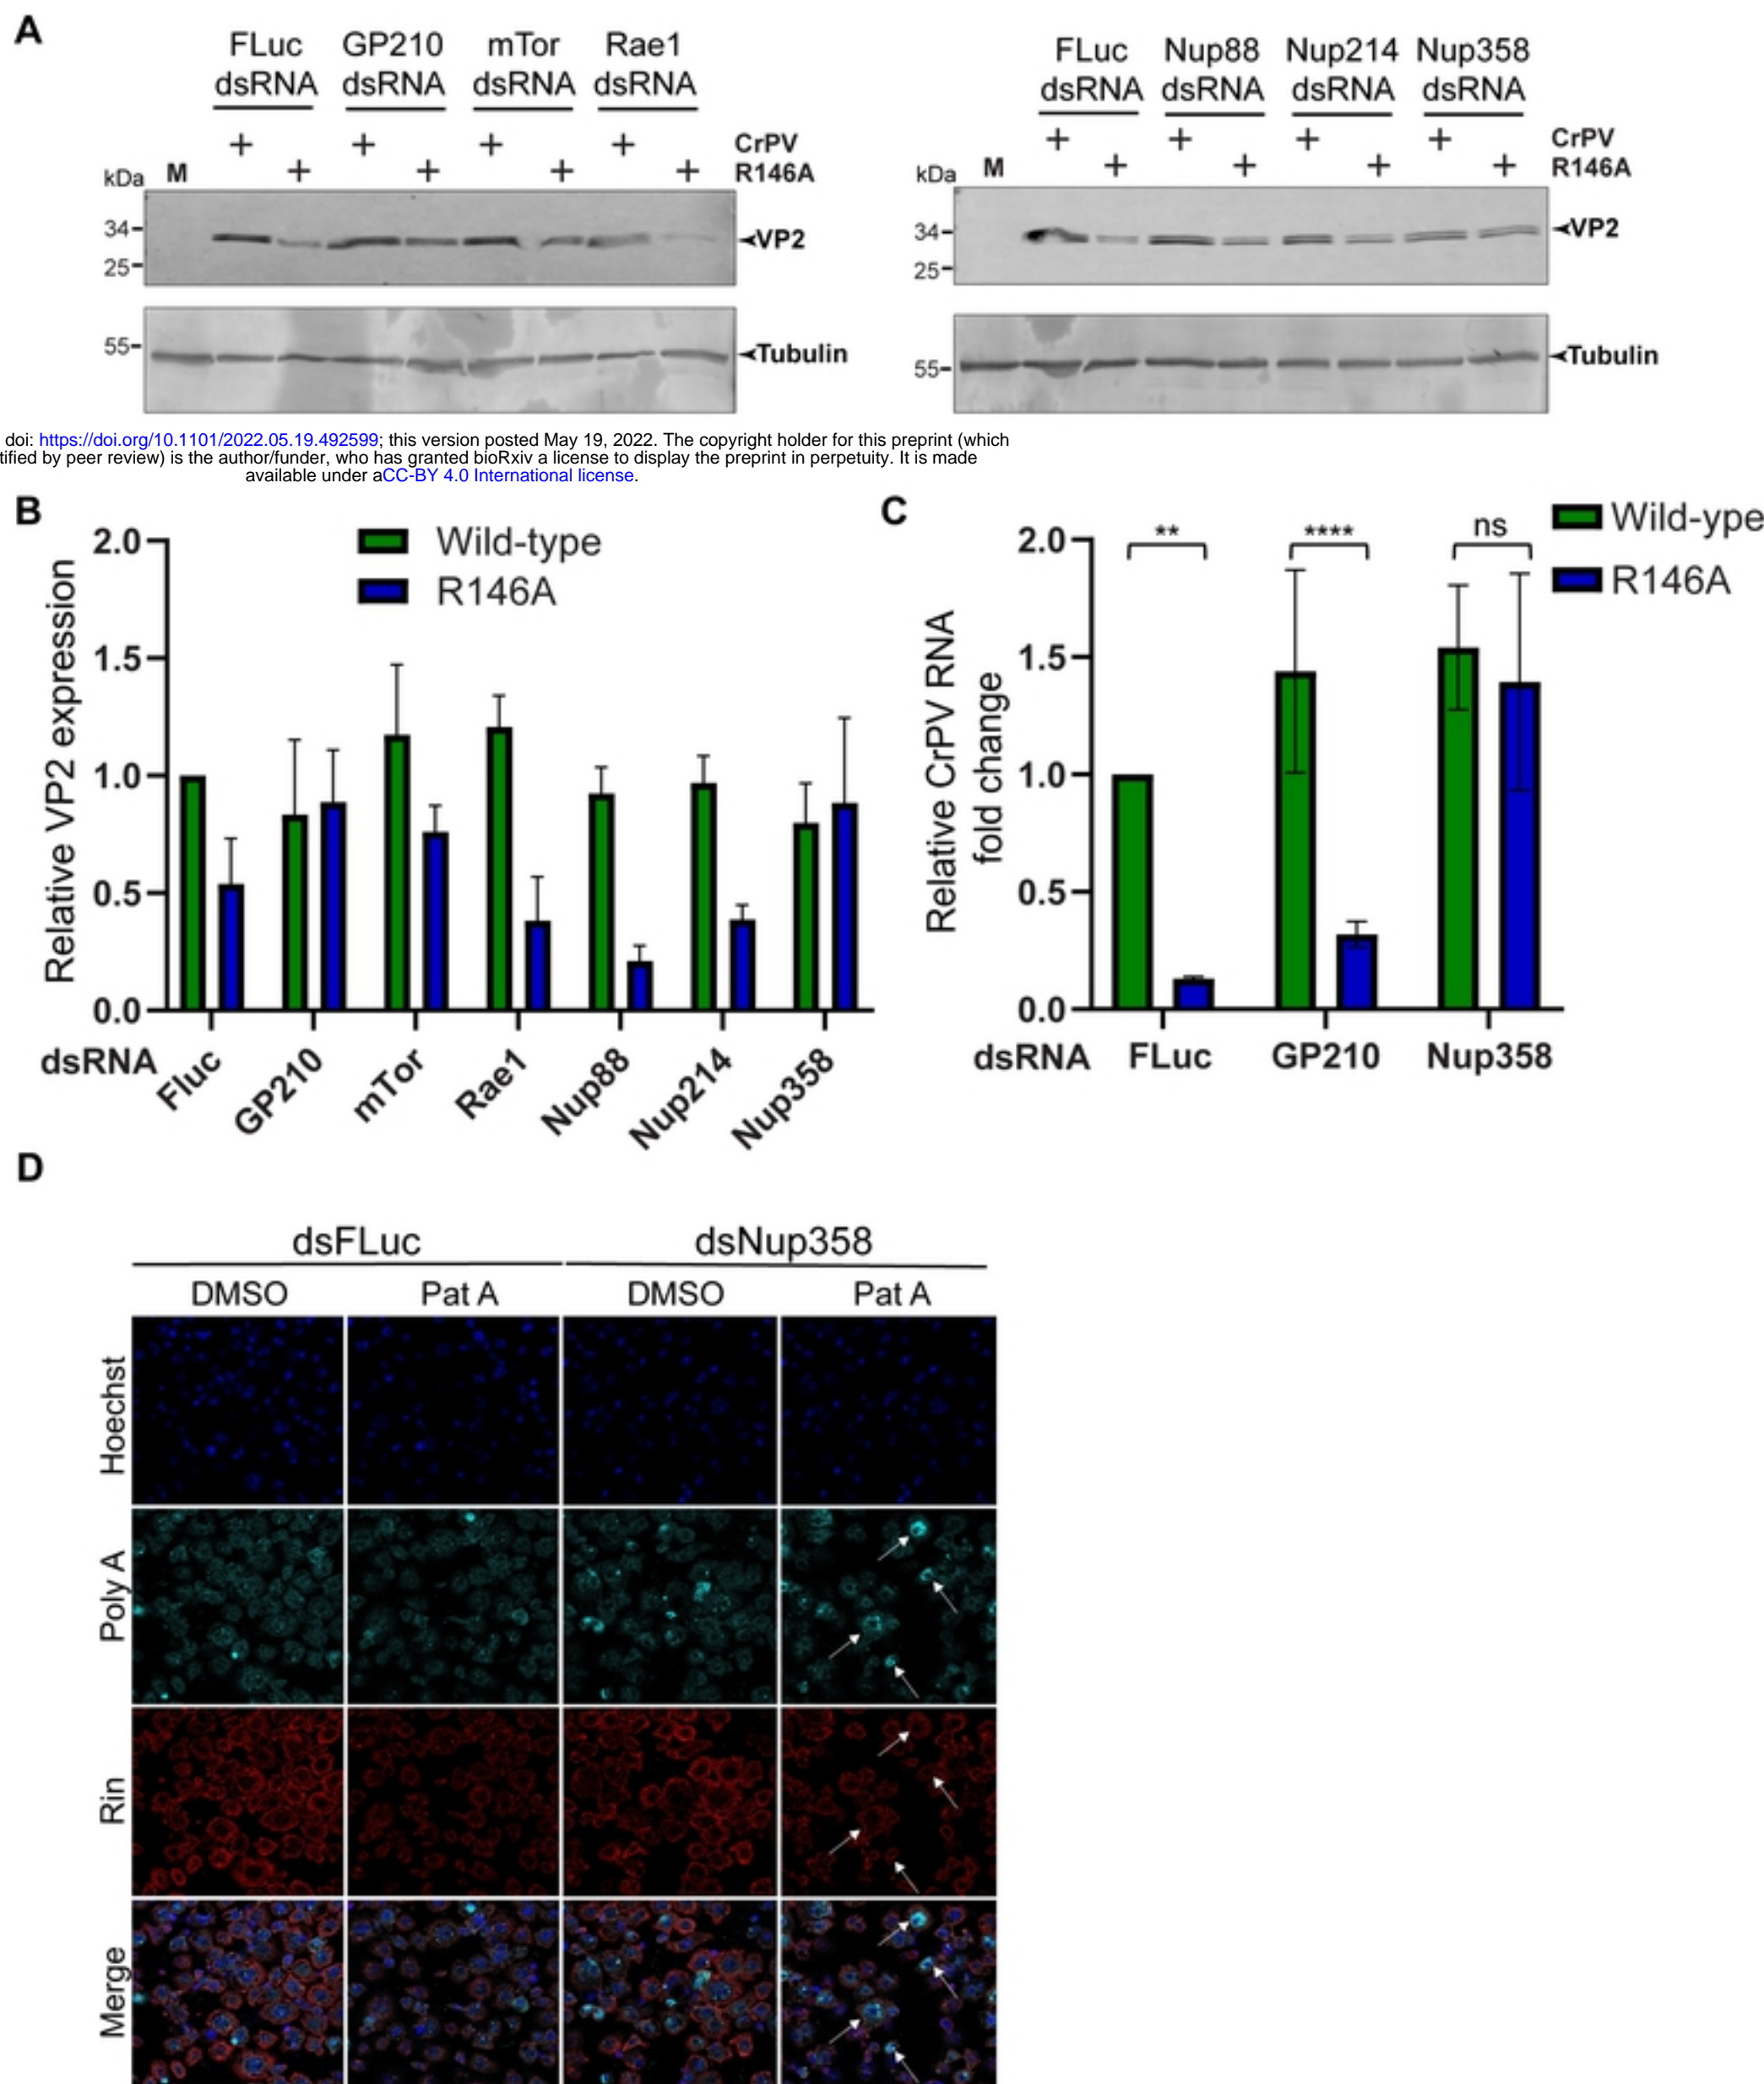

bioRxiv preprint doi: <https://doi.org/10.1101/2022.05.19.492599>; this version posted May 19, 2022. The copyright holder for this preprint (which was not certified by peer review) is the author/funder, who has granted bioRxiv a license to display the preprint in perpetuity. It is made available under aCC-BY 4.0 International license.



**A**

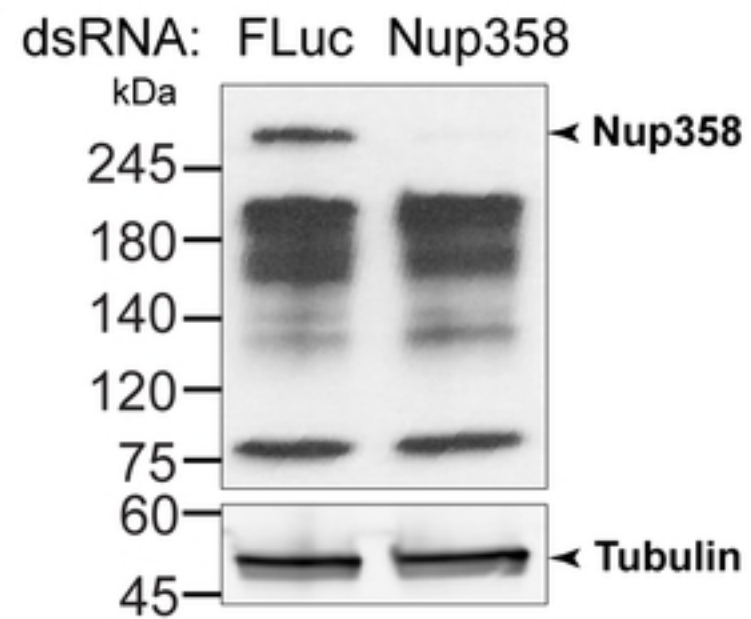

**B**

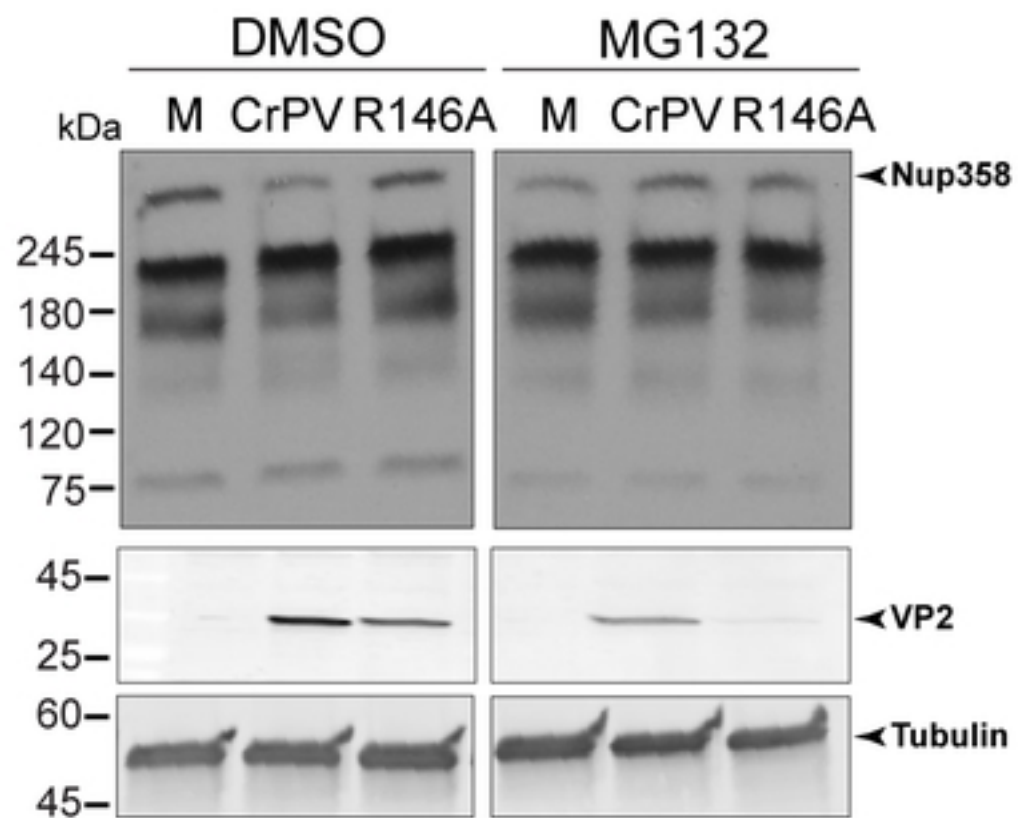

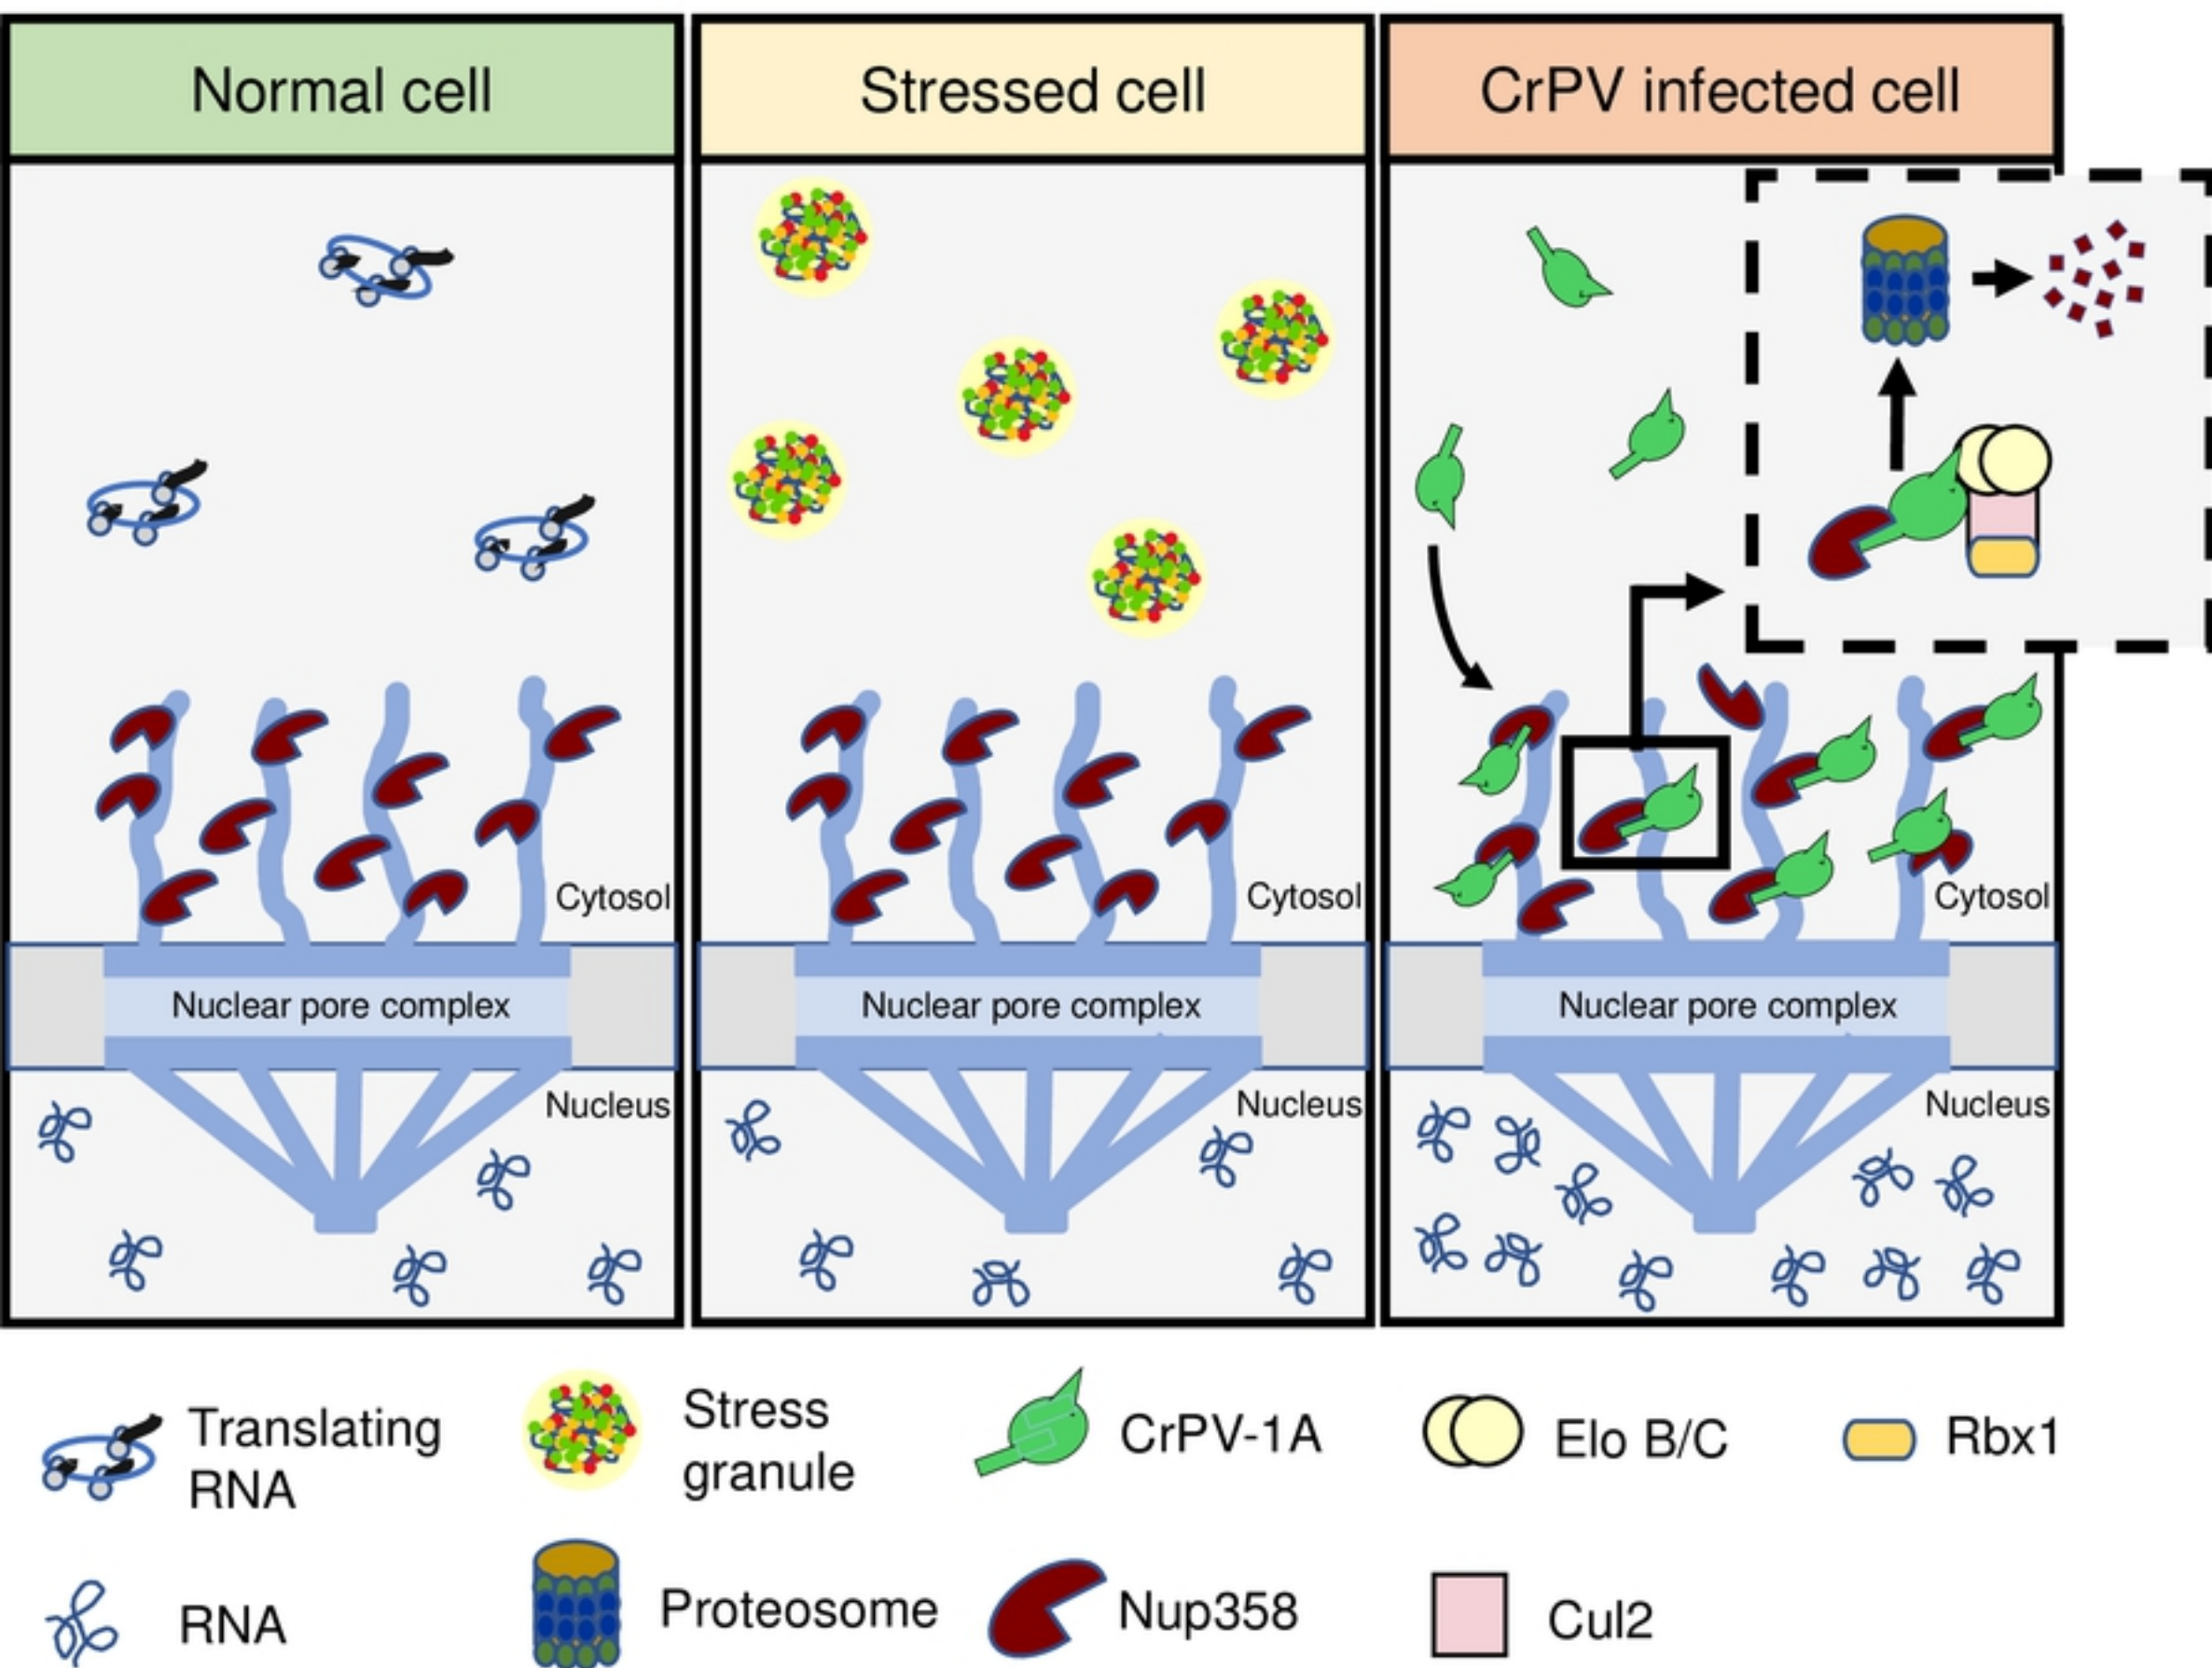

Figure 10
